# Supplementary material for: Continuous synchronization of the Greenland ice-core and U–Th timescales using probabilistic inversion
Source: Copernicus journal article supplement (doi:10.5194/cp-20-1415-2024), 2024-06-28
Supplement: Supplementary file 1 [file cp-20-1415-2024-supplement.zip]

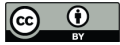

*Supplement of*

## **Continuous synchronization of the Greenland ice-core and U–Th timescales using probabilistic inversion**

**Francesco Muschitiello and Marco Antonio Aquino-Lopez**

*Correspondence to:* Francesco Muschitiello (fm476@cam.ac.uk)

- cp-20-1415-2024-supplement-title-page.pdf
- Muschitiello&Aquino\_Lopez\_Supplementary Data.xlsx
- Supplementary Material.pdf

The copyright of individual parts of the supplement might differ from the article licence.
