# Supplementary material for: Continuous synchronization of the Greenland ice-core and U–Th timescales using probabilistic inversion
Source: Copernicus journal article supplement (doi:10.5194/cp-20-1415-2024), 2024-06-28
Supplement: Supplementary file 2 [file cp-20-1415-2024-supplement.zip]

Archive with 3 entries (3 files):
- Supplementary Material.pdf
- cp-20-1415-2024-supplement-title-page.pdf
- Muschitiello&Aquino_Lopez_Supplementary Data.xlsx
