# Supplementary material for: Continuous synchronization of the Greenland ice-core and U–Th timescales using probabilistic inversion
Source: Copernicus journal article supplement (doi:10.5194/cp-20-1415-2024), 2024-06-28
Supplement: Supplementary file 2 [file cp-20-1415-2024-supplement.zip › Muschitiello&Aquino_Lopez_Supplementary Data.xlsx]

## Sheet: Read me
This is a Supplementary Information Data file for:
Muschitiello, F., and Aquino-Lopez, M.A.
Continuous synchronization of the Greenland ice-core and U-Th timescales using probabilistic inversion, Climate of the Past, 2024
Please cite this reference when using these data
This excel document contains the followiing data sheets:
Sheet nr	Name	Description
2	EASM PC1	East Asian Summer Monsoon stack of 14 d18O speleothem records calculated using Monte Carlo Principal Component
3	∆t CLIM1	Transfer function between the GICC05 and U-Th timescales based on NGRIP Ca2+ data
4	∆t CLIM2	Transfer function between the GICC05 and U-Th timescales based on NGRIP d18O data
5	∆t CLIM3	Transfer function between the GICC05 and U-Th timescales based on GRIP d18O data
Data sheets where the figure data are located:
Figure	Data sheet(s)
2d, 4a, 5a, 6a	2
4c	3
5c	4
6c	5

## Sheet: EASM PC1
U-Th_age_yrsb2k	EASM_PC1	0.05	0.32	0.68	0.95
10600	0.8183	0.4453	0.696	0.9282	1
10650	0.8348	0.4543	0.711	0.9122	0.9938
10700	0.8174	0.4456	0.715	0.89	0.9828
10750	0.7927	0.4414	0.7071	0.8586	0.9644
10800	0.7689	0.4509	0.707	0.8294	0.9498
10850	0.7493	0.4743	0.6833	0.8018	0.9254
10900	0.7004	0.4825	0.643	0.7562	0.8749
10950	0.6723	0.4637	0.6185	0.7219	0.8378
11000	0.6612	0.4806	0.6137	0.7119	0.8368
11050	0.6498	0.4751	0.6058	0.7005	0.8189
11100	0.6385	0.4646	0.5953	0.6843	0.7969
11150	0.6392	0.4714	0.5903	0.6864	0.7906
11200	0.6319	0.4541	0.5884	0.6781	0.7848
11250	0.6135	0.439	0.5659	0.6608	0.7573
11300	0.6027	0.4255	0.5482	0.6483	0.7445
11350	0.5875	0.413	0.5433	0.637	0.7426
11400	0.5513	0.3781	0.5049	0.5945	0.6865
11450	0.5074	0.3413	0.4576	0.5532	0.6557
11500	0.4675	0.2992	0.4104	0.5131	0.6098
11550	0.3881	0.191	0.3334	0.4388	0.5352
11600	0.2934	0.1059	0.2345	0.3418	0.4507
11650	0.221	0.0508	0.1653	0.2647	0.3667
11700	0.1622	-0.011	0.115	0.2088	0.315
11750	0.1324	-0.0274	0.0887	0.1732	0.2764
11800	0.1264	-0.0636	0.0782	0.1721	0.2782
11850	0.1575	-0.0225	0.1103	0.2006	0.295
11900	0.1441	-0.0251	0.097	0.1877	0.287
11950	0.1468	-0.0189	0.1001	0.1909	0.2994
12000	0.1257	-0.0412	0.0792	0.175	0.2848
12050	0.0743	-0.0917	0.0272	0.1237	0.228
12100	0.0369	-0.1116	-0.0064	0.0812	0.1906
12150	0.0672	-0.0836	0.0228	0.1013	0.19
12200	0.0868	-0.0694	0.048	0.1264	0.2206
12250	0.1134	-0.0379	0.0738	0.1565	0.2512
12300	0.0998	-0.0594	0.0594	0.1379	0.2449
12350	0.0399	-0.1012	-0.0027	0.0873	0.2033
12400	0.0251	-0.1125	-0.0178	0.074	0.1785
12450	0.0559	-0.0857	0.0124	0.1053	0.207
12500	0.1182	-0.0405	0.0754	0.1621	0.2669
12550	0.1809	0.0435	0.1465	0.2224	0.3172
12600	0.2275	0.1024	0.1926	0.263	0.3708
12650	0.2906	0.1642	0.2519	0.3339	0.4557
12700	0.33	0.1909	0.2871	0.3753	0.5106
12750	0.3534	0.1989	0.3051	0.3984	0.5145
12800	0.4041	0.2564	0.3668	0.4439	0.5503
12850	0.4837	0.346	0.4381	0.5296	0.6575
12900	0.5736	0.4056	0.5155	0.6347	0.7994
12950	0.6415	0.4566	0.5926	0.6875	0.8135
13000	0.6622	0.5009	0.6217	0.7012	0.8048
13050	0.6539	0.4775	0.5987	0.695	0.8166
13100	0.6284	0.4559	0.5661	0.6887	0.8187
13150	0.6568	0.4739	0.6037	0.7179	0.8454
13200	0.6715	0.5314	0.6305	0.7229	0.8466
13250	0.6565	0.4982	0.6079	0.706	0.8701
13300	0.6349	0.4786	0.5825	0.6884	0.8265
13350	0.6554	0.5033	0.6086	0.7054	0.8465
13400	0.6622	0.5245	0.6147	0.7138	0.8506
13450	0.7055	0.5484	0.652	0.7716	0.946
13500	0.7769	0.5816	0.7082	0.8469	1
13550	0.7608	0.5712	0.6994	0.8366	1
13600	0.704	0.5378	0.6516	0.7711	0.9954
13650	0.7045	0.5282	0.6484	0.7684	0.9843
13700	0.7058	0.5103	0.6461	0.7743	0.94
13750	0.6842	0.5065	0.6375	0.7366	0.8879
13800	0.6764	0.5005	0.6257	0.7271	0.8819
13850	0.6395	0.4533	0.5877	0.6899	0.8398
13900	0.5567	0.3853	0.503	0.6044	0.7471
13950	0.5002	0.3397	0.4517	0.5507	0.6823
14000	0.4349	0.2694	0.3938	0.4806	0.5721
14050	0.4021	0.2404	0.355	0.4482	0.5468
14100	0.3975	0.2345	0.3437	0.4431	0.561
14150	0.387	0.2111	0.3348	0.4331	0.536
14200	0.4142	0.2434	0.3673	0.4667	0.5725
14250	0.3885	0.2139	0.3407	0.4354	0.5595
14300	0.3528	0.152	0.2935	0.4085	0.5288
14350	0.3068	0.1077	0.2541	0.3688	0.5061
14400	0.2682	0.0679	0.2071	0.3251	0.4723
14450	0.2224	0.0017	0.155	0.284	0.4299
14500	0.1189	-0.0953	0.0466	0.2093	0.3647
14550	-0.0118	-0.1964	-0.0727	0.0628	0.2526
14600	-0.1432	-0.3221	-0.2007	-0.0824	0.1282
14650	-0.2668	-0.4345	-0.3219	-0.2114	-0.0223
14700	-0.4095	-0.5651	-0.4546	-0.3595	-0.2093
14750	-0.5128	-0.6703	-0.5643	-0.4542	-0.3016
14800	-0.5934	-0.7701	-0.641	-0.5524	-0.3976
14850	-0.6912	-0.8656	-0.7431	-0.6375	-0.4931
14900	-0.732	-0.9114	-0.7763	-0.6895	-0.5631
14950	-0.7867	-0.9616	-0.8315	-0.7389	-0.6259
15000	-0.7884	-0.9656	-0.8326	-0.7489	-0.655
15050	-0.7783	-0.9533	-0.8208	-0.74	-0.6531
15100	-0.7587	-0.9023	-0.7956	-0.7313	-0.6462
15150	-0.7691	-0.8983	-0.8036	-0.7359	-0.648
15200	-0.791	-0.9273	-0.8305	-0.7496	-0.6479
15250	-0.7809	-0.9488	-0.8254	-0.7389	-0.6192
15300	-0.8094	-0.9812	-0.8636	-0.7566	-0.6256
15350	-0.8062	-0.9701	-0.852	-0.7631	-0.6493
15400	-0.8076	-0.9368	-0.8437	-0.7741	-0.6727
15450	-0.8369	-0.9517	-0.8714	-0.8014	-0.7074
15500	-0.8742	-0.9834	-0.9073	-0.8389	-0.7123
15550	-0.8433	-1	-0.9017	-0.7779	-0.6169
15600	-0.7108	-1	-0.7972	-0.6297	-0.4713
15650	-0.6871	-1	-0.7566	-0.6207	-0.4509
15700	-0.7269	-0.918	-0.7893	-0.6519	-0.4686
15750	-0.7885	-0.9413	-0.8329	-0.718	-0.5618
15800	-0.7836	-0.9457	-0.8382	-0.7199	-0.5449
15850	-0.7453	-0.9687	-0.8092	-0.6701	-0.4664
15900	-0.6933	-0.9334	-0.7682	-0.6265	-0.4387
15950	-0.6889	-0.9128	-0.761	-0.6216	-0.4681
16000	-0.6999	-0.9164	-0.7669	-0.6366	-0.4954
16050	-0.691	-0.9017	-0.7592	-0.6369	-0.5253
16100	-0.6712	-0.902	-0.7417	-0.613	-0.4085
16150	-0.6515	-0.9161	-0.7285	-0.5721	-0.2279
16200	-0.5765	-0.9068	-0.6748	-0.4645	-0.2178
16250	-0.5192	-0.8374	-0.6137	-0.4351	-0.2363
16300	-0.4969	-0.7574	-0.5656	-0.4312	-0.2372
16350	-0.4948	-0.7502	-0.5736	-0.4284	-0.2739
16400	-0.5459	-0.7989	-0.6238	-0.4791	-0.3339
16450	-0.5378	-0.8126	-0.6253	-0.4625	-0.2072
16500	-0.421	-0.747	-0.5081	-0.3109	-0.1439
16550	-0.3527	-0.6579	-0.4306	-0.2807	-0.1277
16600	-0.3932	-0.6858	-0.4633	-0.3191	-0.1607
16650	-0.4603	-0.7347	-0.534	-0.3896	-0.2254
16700	-0.4932	-0.7357	-0.5476	-0.4307	-0.2629
16750	-0.4307	-0.6765	-0.4949	-0.3562	-0.2177
16800	-0.3502	-0.5846	-0.4087	-0.2956	-0.1613
16850	-0.3184	-0.5047	-0.3603	-0.2741	-0.1418
16900	-0.3209	-0.5004	-0.368	-0.2723	-0.1386
16950	-0.3249	-0.4928	-0.371	-0.2745	-0.1613
17000	-0.3318	-0.5026	-0.3787	-0.2839	-0.1781
17050	-0.3558	-0.5164	-0.3993	-0.3128	-0.2038
17100	-0.3758	-0.5342	-0.4172	-0.3343	-0.2354
17150	-0.3811	-0.5624	-0.4359	-0.3335	-0.2281
17200	-0.3752	-0.5672	-0.4397	-0.309	-0.1454
17250	-0.2204	-0.5085	-0.2899	-0.1646	-0.0354
17300	-0.1125	-0.2818	-0.1635	-0.0662	0.0419
17350	-0.066	-0.217	-0.1065	-0.0237	0.1022
17400	-0.066	-0.2697	-0.1184	-0.0163	0.1241
17450	-0.0726	-0.2613	-0.1284	-0.017	0.1298
17500	-0.0131	-0.2306	-0.0739	0.0486	0.168
17550	-0.0194	-0.2716	-0.0928	0.0425	0.1612
17600	-0.0833	-0.2584	-0.1403	-0.0149	0.1307
17650	-0.1077	-0.245	-0.1472	-0.0581	0.0797
17700	-0.1163	-0.2465	-0.1635	-0.0747	0.0369
17750	-0.1313	-0.2617	-0.1713	-0.0805	0.0692
17800	-0.1044	-0.2449	-0.1577	-0.0432	0.1085
17850	-0.0505	-0.2124	-0.1066	0.0158	0.1829
17900	0.0167	-0.1746	-0.0613	0.0851	0.2512
17950	0.1077	-0.1324	0.0434	0.1591	0.2734
18000	0.1424	-0.034	0.0945	0.1844	0.305
18050	0.1358	0.0134	0.0957	0.18	0.2898
18100	0.1347	0.0273	0.1007	0.1769	0.2877
18150	0.1522	0.0338	0.1106	0.1971	0.2954
18200	0.1637	0.0253	0.1172	0.21	0.2971
18250	0.1445	0.0042	0.0947	0.1961	0.3013
18300	0.1088	0.0015	0.0705	0.1524	0.2684
18350	0.1013	-0.0077	0.0688	0.1422	0.2408
18400	0.1055	-0.0106	0.0729	0.1447	0.2382
18450	0.0867	-0.0341	0.0497	0.1268	0.2189
18500	0.085	-0.0451	0.0401	0.1297	0.236
18550	0.1389	-0.0148	0.1059	0.1697	0.2541
18600	0.1675	0.0045	0.133	0.2002	0.2894
18650	0.1992	-0.0186	0.1494	0.2405	0.3399
18700	0.1869	-0.014	0.0862	0.2561	0.5469
18750	0.2809	0.0023	0.109	0.4722	0.5891
18800	0.3895	0.0243	0.2729	0.4987	0.5969
18850	0.2849	-0.0245	0.1943	0.3627	0.5763
18900	0.1715	-0.056	0.0856	0.2631	0.4368
18950	0.2095	-0.034	0.1263	0.2798	0.4459
19000	0.2784	0.0592	0.2277	0.3218	0.423
19050	0.1217	-0.0582	0.0841	0.1581	0.2719
19100	0.1097	-0.0205	0.0857	0.1354	0.2065
19150	0.0834	-0.0289	0.0561	0.1093	0.1885
19200	0.0721	-0.0369	0.0431	0.0971	0.1635
19250	0.0666	-0.0561	0.0374	0.1002	0.1814
19300	0.0706	-0.0748	0.0278	0.1104	0.182
19350	0.0744	-0.0594	0.0316	0.1242	0.2331
19400	0.1193	-0.0724	0.0619	0.172	0.2709
19450	0.0309	-0.1051	-0.0188	0.0861	0.2216
19500	0.0271	-0.0989	-0.0036	0.0637	0.163
19550	0.0432	-0.0764	0.0109	0.0793	0.1642
19600	0.0296	-0.1303	-0.0124	0.0663	0.1666
19650	-0.0013	-0.1741	-0.0609	0.0406	0.1423
19700	-0.0293	-0.1827	-0.0896	0.0227	0.1226
19750	-0.0135	-0.1759	-0.0596	0.0277	0.1122
19800	-0.0101	-0.1851	-0.0522	0.0254	0.1102
19850	-0.0215	-0.2073	-0.0645	0.0147	0.1031
19900	-0.0472	-0.2672	-0.1061	-0.0029	0.0917
19950	-0.0879	-0.3353	-0.1443	-0.0313	0.0803
20000	-0.1488	-0.4026	-0.2095	-0.0885	0.0454
20050	-0.1936	-0.4525	-0.2562	-0.1307	0.0132
20100	-0.2267	-0.4699	-0.2895	-0.1703	-0.0343
20150	-0.2401	-0.4425	-0.3012	-0.1962	-0.0625
20200	-0.235	-0.4243	-0.2963	-0.1966	-0.0831
20250	-0.2335	-0.4047	-0.2891	-0.1974	-0.093
20300	-0.2271	-0.408	-0.2832	-0.1878	-0.0995
20350	-0.235	-0.4199	-0.2886	-0.1936	-0.1067
20400	-0.2462	-0.4251	-0.3012	-0.2085	-0.1125
20450	-0.2547	-0.4309	-0.3141	-0.2138	-0.1307
20500	-0.2517	-0.4314	-0.3114	-0.2147	-0.1321
20550	-0.2391	-0.4171	-0.2949	-0.2035	-0.1133
20600	-0.215	-0.402	-0.2649	-0.1744	-0.0859
20650	-0.1947	-0.3615	-0.2379	-0.1506	-0.0642
20700	-0.1861	-0.3575	-0.2283	-0.1404	-0.057
20750	-0.2021	-0.3994	-0.2526	-0.1571	-0.0677
20800	-0.2383	-0.4566	-0.2917	-0.1897	-0.0896
20850	-0.2665	-0.4756	-0.3149	-0.2168	-0.1077
20900	-0.2584	-0.4417	-0.3082	-0.2088	-0.1124
20950	-0.2511	-0.4459	-0.3023	-0.2024	-0.1198
21000	-0.2471	-0.4397	-0.3033	-0.2034	-0.111
21050	-0.2358	-0.4348	-0.2885	-0.1854	-0.0988
21100	-0.2058	-0.3726	-0.2592	-0.1621	-0.0929
21150	-0.1906	-0.3448	-0.2421	-0.1547	-0.0855
21200	-0.2	-0.3763	-0.2559	-0.1598	-0.0828
21250	-0.2384	-0.4464	-0.2943	-0.1925	-0.0968
21300	-0.2372	-0.4425	-0.2799	-0.1891	-0.0797
21350	-0.2244	-0.4413	-0.2751	-0.175	-0.0803
21400	-0.2583	-0.4528	-0.3057	-0.2141	-0.0982
21450	-0.2844	-0.4698	-0.347	-0.2477	-0.1405
21500	-0.2935	-0.4773	-0.3641	-0.2511	-0.17
21550	-0.2837	-0.4616	-0.3523	-0.2427	-0.1644
21600	-0.2762	-0.4565	-0.3407	-0.2341	-0.1546
21650	-0.2741	-0.4512	-0.3321	-0.2317	-0.1478
21700	-0.2628	-0.4487	-0.3177	-0.2226	-0.1372
21750	-0.2531	-0.4349	-0.3108	-0.2161	-0.1384
21800	-0.2495	-0.4243	-0.3012	-0.2066	-0.126
21850	-0.2367	-0.4352	-0.3	-0.1912	-0.0768
21900	-0.2415	-0.4542	-0.2933	-0.1837	-0.06
21950	-0.2859	-0.5053	-0.3396	-0.227	-0.081
22000	-0.3303	-0.5447	-0.3996	-0.2852	-0.1484
22050	-0.3493	-0.5593	-0.4285	-0.3042	-0.2095
22100	-0.3523	-0.5496	-0.4245	-0.301	-0.2093
22150	-0.3262	-0.5297	-0.3873	-0.2806	-0.1871
22200	-0.2928	-0.4833	-0.35	-0.2413	-0.1531
22250	-0.2736	-0.4447	-0.3284	-0.2266	-0.1528
22300	-0.2702	-0.451	-0.3378	-0.2284	-0.1494
22350	-0.2803	-0.4629	-0.3503	-0.2407	-0.1642
22400	-0.2854	-0.4701	-0.3598	-0.2477	-0.1717
22450	-0.2823	-0.4744	-0.3464	-0.2406	-0.1528
22500	-0.2606	-0.4521	-0.3194	-0.2169	-0.1307
22550	-0.2429	-0.4336	-0.2953	-0.2011	-0.1108
22600	-0.251	-0.4593	-0.3041	-0.2021	-0.1075
22650	-0.2824	-0.4868	-0.3406	-0.2369	-0.1305
22700	-0.3021	-0.4966	-0.3723	-0.2606	-0.1672
22750	-0.2967	-0.4936	-0.3632	-0.2578	-0.1726
22800	-0.2778	-0.4679	-0.3416	-0.233	-0.1458
22850	-0.2557	-0.4388	-0.3183	-0.2108	-0.1228
22900	-0.244	-0.4397	-0.2989	-0.1971	-0.0986
22950	-0.2341	-0.4299	-0.2887	-0.1863	-0.0911
23000	-0.251	-0.4812	-0.3111	-0.1888	-0.0927
23050	-0.3015	-0.5573	-0.3611	-0.2345	-0.1031
23100	-0.3111	-0.5603	-0.3725	-0.2533	-0.1236
23150	-0.2892	-0.5163	-0.3437	-0.2275	-0.1338
23200	-0.2605	-0.4457	-0.3237	-0.2185	-0.1364
23250	-0.2573	-0.4341	-0.3156	-0.2197	-0.1439
23300	-0.2539	-0.4263	-0.3107	-0.2184	-0.1362
23350	-0.2356	-0.416	-0.2902	-0.1963	-0.0779
23400	-0.2104	-0.3936	-0.2642	-0.1682	-0.0607
23450	-0.2025	-0.3809	-0.2442	-0.1594	-0.0548
23500	-0.1882	-0.3667	-0.2386	-0.1465	-0.0539
23550	-0.1887	-0.3526	-0.2322	-0.1473	-0.06
23600	-0.2023	-0.3956	-0.2466	-0.1578	-0.0705
23650	-0.2253	-0.3955	-0.2712	-0.1883	-0.0977
23700	-0.237	-0.4074	-0.2799	-0.1961	-0.1138
23750	-0.2724	-0.4731	-0.327	-0.2277	-0.1318
23800	-0.3231	-0.5263	-0.3752	-0.2756	-0.1829
23850	-0.3461	-0.5468	-0.4037	-0.302	-0.2078
23900	-0.341	-0.5317	-0.3961	-0.2993	-0.2152
23950	-0.3386	-0.5432	-0.4	-0.2976	-0.2186
24000	-0.3864	-0.6594	-0.4619	-0.3279	-0.233
24050	-0.5038	-0.7998	-0.5653	-0.4271	-0.2715
24100	-0.5589	-0.8421	-0.6374	-0.5157	-0.3605
24150	-0.5645	-0.8441	-0.6502	-0.5213	-0.4157
24200	-0.5572	-0.8331	-0.6371	-0.5111	-0.4148
24250	-0.5478	-0.8189	-0.6224	-0.4997	-0.3999
24300	-0.5497	-0.8213	-0.6224	-0.4942	-0.397
24350	-0.5403	-0.8119	-0.6355	-0.4887	-0.3898
24400	-0.5385	-0.8212	-0.6243	-0.4735	-0.3717
24450	-0.5192	-0.7861	-0.6246	-0.458	-0.3591
24500	-0.5191	-0.7919	-0.6078	-0.4539	-0.3449
24550	-0.4863	-0.798	-0.5813	-0.4205	-0.1924
24600	-0.3599	-0.7246	-0.4621	-0.2596	-0.1021
24650	-0.2078	-0.6205	-0.2923	-0.1539	-0.0541
24700	-0.1643	-0.346	-0.2113	-0.1198	-0.0396
24750	-0.1509	-0.3077	-0.1979	-0.1148	-0.0355
24800	-0.1621	-0.315	-0.2092	-0.1252	-0.0485
24850	-0.173	-0.347	-0.2221	-0.1343	-0.0589
24900	-0.1967	-0.3928	-0.2427	-0.1512	-0.0581
24950	-0.2067	-0.4101	-0.262	-0.1608	-0.0584
25000	-0.2091	-0.3994	-0.2604	-0.1606	-0.0674
25050	-0.1907	-0.371	-0.2479	-0.1501	-0.0645
25100	-0.1861	-0.3718	-0.2423	-0.1441	-0.064
25150	-0.2112	-0.4095	-0.2602	-0.1681	-0.0747
25200	-0.2472	-0.4564	-0.3056	-0.203	-0.1035
25250	-0.2739	-0.4697	-0.3468	-0.2305	-0.1352
25300	-0.2835	-0.4881	-0.3661	-0.2431	-0.1525
25350	-0.279	-0.4947	-0.3481	-0.2375	-0.1301
25400	-0.2665	-0.4781	-0.328	-0.2196	-0.0998
25450	-0.2429	-0.4475	-0.2981	-0.1971	-0.0663
25500	-0.2066	-0.4303	-0.2596	-0.151	-0.032
25550	-0.1815	-0.3792	-0.2279	-0.1312	-0.026
25600	-0.1943	-0.3965	-0.2425	-0.1454	-0.0351
25650	-0.2455	-0.4515	-0.3098	-0.1972	-0.0825
25700	-0.2938	-0.499	-0.3481	-0.2423	-0.154
25750	-0.3094	-0.5105	-0.3758	-0.2609	-0.1754
25800	-0.3078	-0.5008	-0.3631	-0.2625	-0.1574
25850	-0.2884	-0.4941	-0.3394	-0.237	-0.1249
25900	-0.2631	-0.4803	-0.3173	-0.2149	-0.1204
25950	-0.2575	-0.4816	-0.3199	-0.2093	-0.1169
26000	-0.2648	-0.4869	-0.3201	-0.2078	-0.1003
26050	-0.2413	-0.481	-0.2986	-0.1851	-0.0737
26100	-0.2069	-0.4443	-0.2722	-0.1565	-0.0469
26150	-0.1796	-0.3906	-0.2356	-0.1321	-0.0469
26200	-0.1678	-0.3834	-0.2249	-0.123	-0.0386
26250	-0.1633	-0.3603	-0.2219	-0.1187	-0.0191
26300	-0.1473	-0.3449	-0.1985	-0.0982	0.0216
26350	-0.1117	-0.3196	-0.167	-0.0594	0.0564
26400	-0.0757	-0.2809	-0.1365	-0.0287	0.1176
26450	-0.0578	-0.2706	-0.1118	-0.0062	0.1873
26500	-0.0698	-0.3004	-0.1261	0.0041	0.2184
26550	-0.0997	-0.3332	-0.161	-0.0384	0.2053
26600	-0.1194	-0.3354	-0.1761	-0.0683	0.1016
26650	-0.1311	-0.333	-0.1867	-0.0847	0.0529
26700	-0.1241	-0.3326	-0.176	-0.0707	0.0666
26750	-0.102	-0.3259	-0.1564	-0.0367	0.1702
26800	-0.0476	-0.306	-0.123	0.0352	0.2099
26850	0.0151	-0.2314	-0.0441	0.0728	0.2228
26900	0.0217	-0.1865	-0.0297	0.0653	0.2189
26950	0.0092	-0.1714	-0.0387	0.0476	0.1698
27000	-0.0111	-0.1847	-0.053	0.0336	0.125
27050	-0.021	-0.1928	-0.0678	0.0197	0.1064
27100	-0.0346	-0.2079	-0.0796	0.0021	0.1031
27150	-0.0535	-0.2258	-0.0991	-0.0089	0.0803
27200	-0.0644	-0.2343	-0.1054	-0.0213	0.0721
27250	-0.0647	-0.241	-0.1059	-0.0263	0.0645
27300	-0.0568	-0.2449	-0.1017	-0.0163	0.065
27350	-0.0478	-0.2295	-0.0876	-0.0122	0.0641
27400	-0.0323	-0.2038	-0.077	0.0016	0.085
27450	-0.0121	-0.1896	-0.0529	0.0273	0.1148
27500	0.0155	-0.1522	-0.03	0.0477	0.1394
27550	0.0339	-0.1294	-0.0054	0.0767	0.1656
27600	0.0665	-0.1025	0.0199	0.11	0.2254
27650	0.1041	-0.0762	0.0561	0.1475	0.2707
27700	0.1429	-0.0528	0.0948	0.1953	0.2976
27750	0.1862	-0.0016	0.1356	0.2371	0.3261
27800	0.211	0.0255	0.1648	0.2515	0.3344
27850	0.1949	-0.0685	0.1491	0.2443	0.3324
27900	0.1556	-0.1699	0.0875	0.2121	0.3226
27950	0.0858	-0.2	-0.0045	0.1567	0.2971
28000	0.0045	-0.2071	-0.0574	0.0897	0.2584
28050	-0.0257	-0.2056	-0.0712	0.0253	0.1849
28100	-0.0321	-0.2073	-0.0787	0.0083	0.1218
28150	-0.044	-0.2077	-0.0834	-0.0045	0.0912
28200	-0.0438	-0.2083	-0.0818	-0.0095	0.0765
28250	-0.0473	-0.208	-0.0856	-0.0134	0.0658
28300	-0.0444	-0.2107	-0.0836	-0.0145	0.0652
28350	-0.0382	-0.21	-0.0811	-0.0091	0.0684
28400	-0.0331	-0.2009	-0.0735	-0.0015	0.0852
28450	-0.0227	-0.2005	-0.0651	0.0112	0.1014
28500	-0.0167	-0.1953	-0.0522	0.0207	0.1142
28550	-0.0156	-0.1916	-0.055	0.0198	0.1054
28600	-0.0142	-0.2008	-0.0618	0.0172	0.1008
28650	-0.0214	-0.2126	-0.0719	0.0118	0.1023
28700	-0.0267	-0.2258	-0.082	0.0093	0.0981
28750	-0.025	-0.2351	-0.0662	0.0142	0.1314
28800	-0.0054	-0.1995	-0.048	0.0518	0.1841
28850	0.0517	-0.1704	-0.0129	0.112	0.2339
28900	0.0978	-0.1156	0.0483	0.1575	0.2686
28950	0.1555	-0.0545	0.1048	0.2087	0.317
29000	0.2098	0.0168	0.1606	0.257	0.3564
29050	0.2625	0.0776	0.2223	0.2977	0.3873
29100	0.2953	0.1501	0.2618	0.3285	0.428
29150	0.3126	0.1662	0.2787	0.3477	0.4509
29200	0.3095	0.091	0.2519	0.3514	0.4564
29250	0.2433	0.0299	0.1583	0.3261	0.4599
29300	0.1491	0.0174	0.109	0.2065	0.4135
29350	0.1183	-0.0214	0.0819	0.1531	0.3632
29400	0.0977	-0.063	0.0611	0.131	0.2317
29450	0.0705	-0.106	0.0266	0.112	0.1919
29500	0.0441	-0.1442	-0.0096	0.0872	0.179
29550	0.0021	-0.161	-0.0454	0.0537	0.1561
29600	-0.0273	-0.1829	-0.0669	0.0164	0.1172
29650	-0.0366	-0.1966	-0.0785	0.0005	0.1043
29700	-0.0486	-0.1957	-0.0865	-0.0042	0.1075
29750	-0.0503	-0.1913	-0.0882	-0.0079	0.0991
29800	-0.0501	-0.1959	-0.0918	-0.0091	0.0972
29850	-0.0536	-0.1996	-0.0921	-0.0184	0.0801
29900	-0.0506	-0.1961	-0.0866	-0.0197	0.0669
29950	-0.0534	-0.1995	-0.0895	-0.0231	0.0545
30000	-0.0563	-0.2085	-0.0951	-0.0209	0.0553
30050	-0.054	-0.2132	-0.0942	-0.0147	0.0599
30100	-0.0618	-0.2362	-0.1061	-0.0207	0.0583
30150	-0.066	-0.2303	-0.1085	-0.0255	0.0599
30200	-0.051	-0.2183	-0.0907	-0.0128	0.0638
30250	-0.0343	-0.1744	-0.0738	-0.0036	0.0732
30300	-0.0195	-0.1552	-0.0563	0.0115	0.0885
30350	-0.0019	-0.1222	-0.0367	0.0274	0.1013
30400	0.0126	-0.1063	-0.0162	0.0412	0.1089
30450	0.0245	-0.0911	-0.0052	0.0518	0.124
30500	0.0363	-0.0755	0.0056	0.0646	0.139
30550	0.0503	-0.0658	0.0171	0.0768	0.1677
30600	0.0613	-0.0532	0.0299	0.0925	0.205
30650	0.0731	-0.0431	0.0419	0.1076	0.2652
30700	0.0865	-0.0298	0.0531	0.1269	0.3154
30750	0.1069	-0.0245	0.0685	0.1739	0.343
30800	0.1405	-0.012	0.0891	0.2343	0.359
30850	0.2044	0.0122	0.1188	0.2743	0.3693
30900	0.244	0.0268	0.1735	0.2906	0.3787
30950	0.263	0.05	0.216	0.2962	0.3799
31000	0.2702	0.0811	0.2291	0.3009	0.3753
31050	0.2668	0.0882	0.2303	0.2968	0.3753
31100	0.2566	0.0841	0.2162	0.2894	0.3736
31150	0.2337	0.0572	0.1815	0.2763	0.3629
31200	0.1921	0.0364	0.1399	0.2483	0.3539
31250	0.1602	0.0309	0.1149	0.2074	0.3475
31300	0.1365	0.0272	0.1058	0.171	0.3071
31350	0.1254	0.0258	0.0944	0.1516	0.2669
31400	0.1161	0.0239	0.0904	0.1449	0.2333
31450	0.1202	0.0174	0.092	0.142	0.2098
31500	0.1204	0.0224	0.0946	0.1442	0.2124
31550	0.1188	0.0182	0.094	0.1405	0.2102
31600	0.1172	0.0043	0.0914	0.1394	0.2098
31650	0.1156	0.0024	0.0827	0.1384	0.2084
31700	0.1088	-0.0053	0.0779	0.1359	0.1995
31750	0.1064	-0.0343	0.0714	0.1309	0.1971
31800	0.0961	-0.047	0.0604	0.1251	0.1963
31850	0.0834	-0.0621	0.0452	0.1207	0.196
31900	0.0763	-0.0724	0.0375	0.1155	0.1982
31950	0.0736	-0.0756	0.0313	0.1152	0.213
32000	0.0717	-0.0799	0.0267	0.1202	0.2532
32050	0.0824	-0.0645	0.0416	0.1306	0.2939
32100	0.1045	-0.0689	0.0545	0.1558	0.3348
32150	0.1303	-0.0611	0.0714	0.2088	0.3649
32200	0.1832	-0.0405	0.0987	0.2587	0.3792
32250	0.2289	-0.0243	0.1488	0.2923	0.4044
32300	0.2684	-0.0025	0.1995	0.3127	0.4423
32350	0.2909	0.0331	0.2428	0.3374	0.4648
32400	0.3059	0.08	0.2559	0.3524	0.4838
32450	0.3288	0.0874	0.2835	0.3772	0.4985
32500	0.348	0.0861	0.2907	0.3906	0.5149
32550	0.3529	0.0566	0.2997	0.3999	0.5187
32600	0.3603	0.029	0.3056	0.4041	0.5215
32650	0.3554	0.0127	0.2923	0.3988	0.5157
32700	0.3395	-0.001	0.2482	0.3901	0.5047
32750	0.3264	-0.0151	0.1385	0.3803	0.4962
32800	0.2774	-0.0195	0.0957	0.3627	0.4958
32850	0.1705	-0.0246	0.0802	0.3413	0.4861
32900	0.1203	-0.0229	0.0638	0.304	0.4688
32950	0.1007	-0.0261	0.0569	0.1795	0.4576
33000	0.0899	-0.0272	0.0556	0.1348	0.4448
33050	0.0878	-0.0268	0.0503	0.1248	0.4248
33100	0.0857	-0.0294	0.0506	0.1233	0.4015
33150	0.0853	-0.0351	0.0507	0.1181	0.3762
33200	0.0843	-0.0333	0.0494	0.1163	0.3319
33250	0.0821	-0.03	0.0522	0.1114	0.2608
33300	0.0837	-0.0303	0.0528	0.1108	0.2266
33350	0.0815	-0.0282	0.0542	0.1086	0.216
33400	0.079	-0.0306	0.0537	0.1101	0.2313
33450	0.0805	-0.0293	0.054	0.1153	0.2632
33500	0.085	-0.0304	0.0555	0.1168	0.286
33550	0.0865	-0.0248	0.0565	0.1222	0.3033
33600	0.089	-0.0247	0.0547	0.1327	0.3193
33650	0.0929	-0.0275	0.0553	0.1589	0.3487
33700	0.105	-0.0266	0.0613	0.1826	0.371
33750	0.1169	-0.0212	0.0678	0.2245	0.3882
33800	0.1434	-0.0198	0.0796	0.2477	0.3932
33850	0.1868	-0.0177	0.0897	0.2668	0.4192
33900	0.2063	-0.0132	0.1036	0.2801	0.4189
33950	0.2249	-0.0041	0.1203	0.2939	0.4369
34000	0.2338	-0.012	0.1348	0.305	0.4469
34050	0.2379	-0.0104	0.1379	0.3131	0.4664
34100	0.2259	-0.0117	0.1254	0.3129	0.4483
34150	0.2002	-0.0162	0.1053	0.2941	0.4467
34200	0.1456	-0.02	0.0867	0.2553	0.4375
34250	0.1201	-0.0322	0.0709	0.205	0.4214
34300	0.1056	-0.0327	0.0629	0.1698	0.3914
34350	0.0949	-0.0296	0.0555	0.1423	0.3472
34400	0.0872	-0.035	0.0518	0.1284	0.2951
34450	0.0838	-0.0352	0.052	0.1172	0.269
34500	0.0803	-0.0402	0.049	0.1117	0.2412
34550	0.0777	-0.0323	0.0491	0.1107	0.24
34600	0.0751	-0.0305	0.0499	0.1113	0.2445
34650	0.0817	-0.0217	0.0518	0.1183	0.2581
34700	0.0904	-0.0232	0.055	0.129	0.2766
34750	0.094	-0.0202	0.0605	0.1509	0.29
34800	0.107	-0.0276	0.0683	0.1789	0.3123
34850	0.131	-0.0209	0.0759	0.2055	0.3224
34900	0.1634	-0.0165	0.091	0.226	0.3403
34950	0.1939	-0.0052	0.1145	0.2482	0.3639
35000	0.2184	0.0032	0.1634	0.266	0.3946
35050	0.2389	0.0196	0.1934	0.2789	0.4475
35100	0.2546	0.0509	0.2109	0.3023	0.4713
35150	0.2701	0.0886	0.2296	0.3205	0.4895
35200	0.2831	0.1384	0.2422	0.344	0.5153
35250	0.3018	0.1612	0.255	0.3577	0.5211
35300	0.3112	0.1792	0.2684	0.369	0.5437
35350	0.3274	0.192	0.2779	0.3852	0.5641
35400	0.3424	0.1988	0.2932	0.3942	0.559
35450	0.3507	0.2084	0.2985	0.4047	0.5559
35500	0.3563	0.2092	0.308	0.4047	0.5602
35550	0.3594	0.2143	0.3112	0.4097	0.5578
35600	0.36	0.2137	0.3138	0.407	0.5689
35650	0.3604	0.205	0.314	0.4068	0.5571
35700	0.3616	0.1602	0.3137	0.4067	0.5585
35750	0.3571	0.1338	0.3101	0.4048	0.5407
35800	0.351	0.1023	0.2991	0.3948	0.527
35850	0.3428	0.0908	0.2928	0.3888	0.5263
35900	0.34	0.0755	0.274	0.3834	0.5113
35950	0.325	0.0699	0.2267	0.3746	0.4967
36000	0.2963	0.0708	0.1794	0.3654	0.4871
36050	0.236	0.0533	0.1576	0.3481	0.4656
36100	0.1913	0.0577	0.1446	0.3228	0.4487
36150	0.169	0.0476	0.1312	0.2314	0.4267
36200	0.1593	0.0269	0.1241	0.1977	0.4059
36250	0.1509	0.0217	0.1176	0.1881	0.3598
36300	0.152	0.0236	0.1213	0.1818	0.3158
36350	0.1534	0.0257	0.1199	0.1889	0.315
36400	0.1587	0.0141	0.1235	0.2006	0.3439
36450	0.1641	0.0152	0.1244	0.2127	0.375
36500	0.1671	0.0059	0.1234	0.2273	0.4008
36550	0.1711	-0.0141	0.1191	0.2366	0.432
36600	0.1707	-0.0131	0.1174	0.2472	0.4408
36650	0.1746	-0.0076	0.1138	0.2619	0.4616
36700	0.1836	-0.0175	0.119	0.2756	0.4739
36750	0.1939	-0.0198	0.125	0.3025	0.4739
36800	0.2189	-0.0248	0.128	0.3262	0.5124
36850	0.2512	-0.023	0.1439	0.3509	0.525
36900	0.2777	0.0052	0.1581	0.3725	0.5428
36950	0.3078	0.0065	0.1922	0.3848	0.5572
37000	0.3286	0.0154	0.2285	0.3986	0.5764
37050	0.3482	0.0273	0.273	0.4134	0.5788
37100	0.3685	0.0757	0.302	0.4309	0.5959
37150	0.3856	0.2063	0.3276	0.4504	0.6078
37200	0.4034	0.2392	0.3428	0.4651	0.6259
37250	0.4092	0.2414	0.3471	0.4839	0.6444
37300	0.4144	0.24	0.3484	0.4963	0.6557
37350	0.4335	0.2496	0.3618	0.5179	0.6824
37400	0.4594	0.2596	0.379	0.5463	0.7008
37450	0.4873	0.2568	0.4056	0.563	0.7075
37500	0.5027	0.2835	0.437	0.571	0.7107
37550	0.516	0.2893	0.4529	0.5741	0.7087
37600	0.5213	0.3019	0.469	0.5724	0.6964
37650	0.5217	0.327	0.4738	0.5676	0.6793
37700	0.5246	0.3579	0.4755	0.5672	0.6783
37750	0.5189	0.3623	0.4756	0.5604	0.6669
37800	0.5175	0.3625	0.4762	0.5581	0.663
37850	0.5086	0.3753	0.4743	0.55	0.6802
37900	0.5087	0.365	0.4671	0.5606	0.7016
37950	0.5086	0.3511	0.4595	0.5568	0.6997
38000	0.5014	0.3323	0.4518	0.5505	0.6965
38050	0.4918	0.2791	0.4358	0.5393	0.7014
38100	0.4704	0.2205	0.4164	0.5325	0.696
38150	0.4534	0.1675	0.3947	0.5131	0.6648
38200	0.433	0.1331	0.3635	0.4904	0.6558
38250	0.4058	0.0721	0.3254	0.4766	0.638
38300	0.3707	-0.0098	0.2816	0.4457	0.621
38350	0.3501	-0.0876	0.2524	0.4209	0.6014
38400	0.3188	-0.1041	0.2251	0.3962	0.5966
38450	0.2934	-0.1593	0.1771	0.3763	0.5692
38500	0.2763	-0.1751	0.1544	0.367	0.5429
38550	0.2651	-0.2159	0.0707	0.3646	0.5416
38600	0.1941	-0.2448	-0.0127	0.3197	0.5204
38650	0.103	-0.2629	-0.0685	0.2888	0.4913
38700	0.0202	-0.3025	-0.1054	0.2436	0.4806
38750	-0.0447	-0.3487	-0.1398	0.0954	0.4542
38800	-0.0849	-0.3717	-0.1643	0.0344	0.4195
38850	-0.1163	-0.3833	-0.1858	-0.012	0.3869
38900	-0.1408	-0.3998	-0.2068	-0.0557	0.3377
38950	-0.1617	-0.4091	-0.2339	-0.0898	0.227
39000	-0.1824	-0.4244	-0.242	-0.1081	0.1471
39050	-0.1863	-0.4383	-0.2516	-0.1218	0.0878
39100	-0.1968	-0.4568	-0.2597	-0.1376	0.0765
39150	-0.202	-0.4658	-0.2722	-0.1481	0.0217
39200	-0.2133	-0.4682	-0.2802	-0.1629	-0.0172
39250	-0.2211	-0.4697	-0.2853	-0.175	-0.0105
39300	-0.2216	-0.4739	-0.2887	-0.1723	-0.033
39350	-0.2118	-0.47	-0.2723	-0.1555	-0.0299
39400	-0.1956	-0.4712	-0.2636	-0.1396	-0.013
39450	-0.1746	-0.4372	-0.2442	-0.1128	0.0261
39500	-0.1412	-0.4258	-0.2163	-0.0799	0.046
39550	-0.1052	-0.4177	-0.1825	-0.045	0.0691
39600	-0.0768	-0.3626	-0.1463	-0.0224	0.0892
39650	-0.0528	-0.3445	-0.1251	-0.0075	0.1057
39700	-0.0352	-0.3058	-0.0972	0.0115	0.1204
39750	-0.0227	-0.2806	-0.0713	0.0243	0.1247
39800	-0.0113	-0.2347	-0.0547	0.0338	0.1334
39850	-0.0003	-0.1813	-0.0432	0.0402	0.1578
39900	-0.0014	-0.1622	-0.039	0.0413	0.1715
39950	-0.002	-0.1515	-0.0422	0.0383	0.1864
40000	0.0099	-0.1556	-0.0292	0.0505	0.3069
40050	0.0241	-0.142	-0.0207	0.0816	0.373
40100	0.0503	-0.1336	-0.0033	0.1372	0.4263
40150	0.0762	-0.1242	0.0123	0.1892	0.467
40200	0.1082	-0.1178	0.0298	0.285	0.4855
40250	0.1808	-0.1132	0.0466	0.3472	0.5094
40300	0.256	-0.1011	0.0777	0.3779	0.5061
40350	0.3243	-0.0887	0.1227	0.3949	0.5244
40400	0.3573	-0.0903	0.2286	0.4079	0.5229
40450	0.371	-0.0442	0.2914	0.4184	0.5288
40500	0.3871	-0.0206	0.3209	0.4321	0.538
40550	0.3917	0.1082	0.3356	0.4374	0.5472
40600	0.3938	0.1327	0.3312	0.4442	0.5483
40650	0.383	0.1059	0.3008	0.441	0.5542
40700	0.3699	0.092	0.2831	0.4354	0.5542
40750	0.3433	0.0896	0.2496	0.4257	0.5378
40800	0.3152	0.0757	0.2394	0.4123	0.5397
40850	0.2977	0.0679	0.2177	0.3908	0.534
40900	0.2838	0.0532	0.215	0.36	0.5271
40950	0.2706	0.0559	0.2072	0.3446	0.518
41000	0.2605	0.0446	0.1997	0.3407	0.5151
41050	0.2658	0.0514	0.2018	0.3395	0.5199
41100	0.2527	0.0496	0.1976	0.3253	0.4867
41150	0.2438	0.0431	0.1832	0.3126	0.4939
41200	0.2321	0.0369	0.176	0.2907	0.4627
41250	0.2157	0.0321	0.1647	0.2734	0.4436
41300	0.1941	0.0146	0.1518	0.2477	0.4311
41350	0.187	0.0207	0.1412	0.2322	0.3894
41400	0.1762	0.0104	0.1281	0.2208	0.3735
41450	0.1697	0.0072	0.1245	0.2131	0.356
41500	0.1673	0.0031	0.1294	0.2061	0.3403
41550	0.1645	-0.0012	0.1225	0.2024	0.3548
41600	0.1723	0.0142	0.1328	0.2142	0.3632
41650	0.1732	0.0136	0.1383	0.2149	0.3603
41700	0.1748	0.0294	0.1366	0.2234	0.373
41750	0.1775	0.0149	0.1324	0.2352	0.3917
41800	0.1878	0.0293	0.1423	0.2425	0.3942
41850	0.2018	0.0296	0.1498	0.2688	0.4059
41900	0.2066	0.04	0.1501	0.2801	0.4186
41950	0.2208	0.0395	0.1689	0.3007	0.4235
42000	0.2391	0.0425	0.1725	0.3113	0.4368
42050	0.2697	0.0468	0.1858	0.3316	0.4429
42100	0.3092	0.067	0.2468	0.3531	0.4572
42150	0.3354	0.0729	0.2845	0.3715	0.4731
42200	0.3264	0.0494	0.2678	0.3714	0.4844
42250	0.3132	0.0216	0.2534	0.3669	0.5036
42300	0.3083	0.0207	0.2301	0.3691	0.5436
42350	0.2979	0.0061	0.2093	0.3675	0.5435
42400	0.2865	0.0101	0.1896	0.3633	0.5619
42450	0.2814	0.0095	0.1822	0.3607	0.5556
42500	0.2717	-0.0091	0.1715	0.364	0.5614
42550	0.2662	-0.0021	0.162	0.3579	0.5493
42600	0.2597	-0.0024	0.1613	0.3613	0.5622
42650	0.2599	-0.0014	0.1628	0.3599	0.5673
42700	0.263	-0.0097	0.1682	0.3568	0.5626
42750	0.2725	-0.0174	0.175	0.3629	0.5499
42800	0.2804	-0.0296	0.1766	0.3615	0.5723
42850	0.2956	-0.0078	0.192	0.3745	0.5652
42900	0.3186	-0.0099	0.2185	0.387	0.561
42950	0.3323	0.0199	0.2432	0.3932	0.5741
43000	0.3442	0.0365	0.2783	0.4041	0.5492
43050	0.3457	0.0719	0.2937	0.3965	0.5196
43100	0.3538	0.1887	0.3097	0.3948	0.4997
43150	0.3502	0.2144	0.3135	0.3837	0.4847
43200	0.327	0.2047	0.293	0.3624	0.455
43250	0.3073	0.1819	0.2738	0.3416	0.4295
43300	0.2917	0.1711	0.2563	0.3217	0.4186
43350	0.2807	0.1493	0.2479	0.3137	0.4032
43400	0.2783	0.1338	0.2456	0.3122	0.3967
43450	0.2727	0.1072	0.2418	0.3108	0.3956
43500	0.2702	0.036	0.2337	0.3043	0.3945
43550	0.2665	0.0088	0.2164	0.3027	0.3939
43600	0.2531	-0.0089	0.1906	0.297	0.4034
43650	0.2303	-0.0277	0.1306	0.2883	0.3942
43700	0.1934	-0.0353	0.0904	0.2713	0.3887
43750	0.151	-0.0486	0.0735	0.2385	0.3838
43800	0.1277	-0.0489	0.0708	0.2182	0.3792
43850	0.1183	-0.0469	0.0645	0.1926	0.362
43900	0.1169	-0.0505	0.061	0.1844	0.3601
43950	0.1138	-0.0509	0.0629	0.1784	0.3468
44000	0.1084	-0.06	0.0615	0.1662	0.3275
44050	0.1053	-0.0611	0.0576	0.1666	0.3099
44100	0.1069	-0.0634	0.0562	0.1605	0.2969
44150	0.1056	-0.0623	0.0584	0.1597	0.3006
44200	0.1074	-0.067	0.0563	0.1601	0.3028
44250	0.1061	-0.0649	0.055	0.1576	0.3065
44300	0.1098	-0.0607	0.0554	0.1597	0.313
44350	0.1102	-0.0614	0.0604	0.1619	0.3074
44400	0.1107	-0.0587	0.0629	0.1649	0.3152
44450	0.1116	-0.0564	0.0652	0.1638	0.3225
44500	0.1127	-0.0534	0.0684	0.1698	0.3287
44550	0.1198	-0.0453	0.0726	0.1793	0.3366
44600	0.1273	-0.0412	0.0809	0.1838	0.3421
44650	0.1359	-0.0396	0.0856	0.19	0.3435
44700	0.153	-0.0326	0.0967	0.2035	0.3702
44750	0.166	-0.0188	0.1094	0.2272	0.3771
44800	0.1849	-0.0098	0.1242	0.2513	0.4003
44850	0.2109	0.0027	0.1445	0.2753	0.4142
44900	0.2295	0.0205	0.169	0.2805	0.4069
44950	0.242	0.0412	0.1948	0.2881	0.403
45000	0.2459	0.0625	0.2054	0.2868	0.3955
45050	0.2492	0.0816	0.2119	0.2811	0.3761
45100	0.2501	0.1063	0.219	0.2787	0.3677
45150	0.245	0.1165	0.2159	0.2734	0.356
45200	0.238	0.1123	0.2114	0.2671	0.3461
45250	0.2334	0.1118	0.1999	0.2627	0.3499
45300	0.2206	0.1027	0.1893	0.2538	0.3342
45350	0.2143	0.095	0.18	0.243	0.3254
45400	0.2124	0.0984	0.1787	0.2438	0.3233
45450	0.2154	0.1057	0.1816	0.2458	0.3217
45500	0.2174	0.11	0.1889	0.2502	0.3204
45550	0.23	0.1098	0.2013	0.2575	0.3256
45600	0.2357	0.1201	0.206	0.2644	0.337
45650	0.2368	0.1347	0.2111	0.2661	0.3429
45700	0.2401	0.1362	0.211	0.2674	0.348
45750	0.2378	0.1357	0.2109	0.2719	0.3695
45800	0.2423	0.1334	0.2139	0.2784	0.3998
45850	0.2553	0.1393	0.2181	0.3047	0.4359
45900	0.2808	0.1497	0.2369	0.3256	0.4389
45950	0.2962	0.1693	0.2568	0.3366	0.4469
46000	0.3046	0.1843	0.2742	0.3402	0.4481
46050	0.3148	0.1955	0.2776	0.3592	0.4785
46100	0.3255	0.203	0.2893	0.3759	0.4987
46150	0.3602	0.22	0.3092	0.411	0.5174
46200	0.3898	0.2395	0.3433	0.427	0.529
46250	0.4085	0.2659	0.3705	0.4456	0.5341
46300	0.4125	0.2855	0.3783	0.4429	0.5336
46350	0.4088	0.2995	0.3766	0.4416	0.5359
46400	0.4038	0.3007	0.3732	0.4372	0.5273
46450	0.3985	0.2877	0.3664	0.4316	0.5327
46500	0.3969	0.2884	0.3665	0.4316	0.5432
46550	0.3996	0.2708	0.3612	0.4343	0.5625
46600	0.3971	0.256	0.3584	0.436	0.5529
46650	0.3933	0.2445	0.3489	0.4326	0.5613
46700	0.3714	0.2228	0.3233	0.4198	0.5601
46750	0.3502	0.2129	0.3082	0.399	0.554
46800	0.3294	0.2073	0.2886	0.3718	0.5139
46850	0.3198	0.2037	0.2876	0.3538	0.4879
46900	0.3171	0.2022	0.2859	0.3472	0.4478
46950	0.3165	0.203	0.2861	0.3504	0.4459
47000	0.3126	0.1868	0.2804	0.3456	0.4383
47050	0.3118	0.1837	0.2768	0.338	0.4271
47100	0.2984	0.1648	0.2644	0.3287	0.4198
47150	0.291	0.0858	0.2548	0.3211	0.4064
47200	0.2851	-0.0123	0.2404	0.3173	0.4062
47250	0.2731	-0.0536	0.2084	0.3126	0.4044
47300	0.2363	-0.1023	0.0671	0.298	0.3969
47350	0.1187	-0.1581	0.0035	0.2651	0.3802
47400	0.0245	-0.1784	-0.0343	0.18	0.3656
47450	-0.0109	-0.1899	-0.0645	0.0634	0.3435
47500	-0.0265	-0.1991	-0.0758	0.0218	0.3256
47550	-0.0413	-0.2005	-0.0841	0.0022	0.3065
47600	-0.0516	-0.2138	-0.0946	-0.0116	0.2618
47650	-0.0596	-0.2221	-0.1006	-0.0218	0.1251
47700	-0.0677	-0.2439	-0.1124	-0.0282	0.0703
47750	-0.0787	-0.2641	-0.1313	-0.0394	0.0585
47800	-0.0915	-0.2921	-0.1469	-0.0491	0.0486
47850	-0.1011	-0.3073	-0.1592	-0.0581	0.0407
47900	-0.1155	-0.3227	-0.1725	-0.0694	0.0265
47950	-0.1253	-0.3395	-0.1883	-0.0813	0.0194
48000	-0.1389	-0.3637	-0.1937	-0.0919	0.0045
48050	-0.1439	-0.3695	-0.2046	-0.0977	-0.0057
48100	-0.1517	-0.3963	-0.2125	-0.1033	-0.0116
48150	-0.1569	-0.422	-0.219	-0.1079	-0.0076
48200	-0.1597	-0.4444	-0.224	-0.1101	-0.0037
48250	-0.1606	-0.4662	-0.2262	-0.1123	0.0012
48300	-0.1623	-0.4679	-0.2284	-0.1114	0.0072
48350	-0.1612	-0.4784	-0.2274	-0.1089	0.0153
48400	-0.1573	-0.4754	-0.2211	-0.1061	0.0305
48450	-0.1527	-0.4783	-0.2139	-0.0989	0.0535
48500	-0.1466	-0.4708	-0.2062	-0.091	0.0944
48550	-0.1378	-0.4643	-0.1981	-0.083	0.1037
48600	-0.1274	-0.4519	-0.1853	-0.0724	0.1486
48650	-0.1129	-0.4454	-0.1687	-0.0594	0.1707
48700	-0.0981	-0.434	-0.1523	-0.048	0.1943
48750	-0.0779	-0.4075	-0.1354	-0.0239	0.2067
48800	-0.0565	-0.3796	-0.1075	0.0003	0.2212
48850	-0.0403	-0.3172	-0.0851	0.0192	0.2311
48900	-0.0189	-0.2431	-0.0627	0.0602	0.2339
48950	0.0054	-0.1987	-0.0434	0.1085	0.2376
49000	0.028	-0.15	-0.0278	0.1347	0.2544
49050	0.0681	-0.1234	-0.0039	0.1548	0.2559
49100	0.1066	-0.1015	0.0171	0.1757	0.2648
49150	0.1381	-0.088	0.0488	0.1865	0.2739
49200	0.1575	-0.0726	0.0988	0.1988	0.2805
49250	0.1735	-0.0488	0.123	0.2094	0.3017
49300	0.1898	-0.0273	0.1493	0.2234	0.3153
49350	0.2059	0.0009	0.1629	0.2375	0.3424
49400	0.2171	0.0515	0.1803	0.2517	0.3601
49450	0.2305	0.0865	0.194	0.2704	0.3845
49500	0.2429	0.1085	0.2097	0.2835	0.4002
49550	0.2542	0.1285	0.2196	0.2985	0.4236
49600	0.2661	0.1414	0.2282	0.3067	0.4475
49650	0.2761	0.1466	0.2361	0.3229	0.4785
49700	0.2918	0.1525	0.2482	0.3435	0.495
49750	0.3034	0.159	0.2571	0.3565	0.5014
49800	0.3173	0.1588	0.2677	0.3707	0.5133
49850	0.3284	0.1571	0.2782	0.3866	0.5221
49900	0.3418	0.1621	0.2853	0.3972	0.5353
49950	0.3498	0.1605	0.2943	0.415	0.5557
50000	0.3571	0.1538	0.2956	0.4218	0.567

## Sheet: ∆t CLIM1
Age_yrsb2k	∆years_(Hulu_minus_GICC05)	0.05	0.32	0.68	0.95
10750	-45.1	-66.3	-50.2	-40.2	-23.4
10800	-44.8	-66	-49.9	-39.8	-23.1
10850	-44.5	-65.7	-49.6	-39.4	-22.7
10900	-44.1	-65.4	-49.3	-39	-22.3
10950	-43.7	-65.1	-49	-38.6	-21.9
11000	-43.3	-64.8	-48.6	-38.1	-21.4
11050	-42.9	-64.5	-48.2	-37.6	-20.9
11100	-42.4	-64.1	-47.8	-37.1	-20.4
11150	-41.9	-63.7	-47.3	-36.5	-19.7
11200	-41.2	-63.2	-46.7	-35.8	-18.9
11250	-40.6	-62.8	-46.1	-35.1	-18.1
11300	-39.9	-62.3	-45.5	-34.4	-17.3
11350	-39	-61.6	-44.6	-33.4	-16.1
11400	-38	-60.9	-43.7	-32.3	-14.9
11450	-36.9	-60.2	-42.8	-31.2	-13.6
11500	-35.9	-59.4	-41.8	-30.1	-12.3
11550	-34.4	-58.4	-40.4	-28.5	-10.5
11600	-33	-57.4	-39.1	-27	-8.7
11650	-31.5	-56.3	-37.8	-25.4	-6.8
11700	-30	-55.2	-36.3	-23.8	-4.9
11750	-28.3	-54.1	-34.8	-21.9	-2.8
11800	-26.6	-52.9	-33.2	-20.1	-0.6
11850	-24.9	-51.8	-31.7	-18.3	1.6
11900	-23.2	-50.7	-30.1	-16.5	3.7
11950	-21.5	-49.6	-28.6	-14.7	5.9
12000	-19.9	-48.6	-27.1	-12.9	8.1
12050	-18.2	-47.5	-25.6	-11.1	10.3
12100	-16.7	-46.6	-24.2	-9.5	12.1
12150	-15.3	-45.6	-22.9	-7.9	14
12200	-13.8	-44.7	-21.6	-6.4	15.8
12250	-12.5	-43.8	-20.3	-4.9	17.5
12300	-11.4	-42.9	-19.3	-3.8	18.8
12350	-10.3	-42.1	-18.3	-2.6	20
12400	-9.2	-41.3	-17.3	-1.5	21.2
12450	-8.3	-40.5	-16.4	-0.6	22.2
12500	-7.6	-39.6	-15.6	0.2	22.9
12550	-6.8	-38.8	-14.9	0.9	23.6
12600	-6	-38	-14.1	1.7	24.3
12650	-5.5	-37.2	-13.5	2.2	24.8
12700	-4.9	-36.5	-12.9	2.7	25.1
12750	-4.4	-35.7	-12.3	3.2	25.5
12800	-3.9	-34.9	-11.7	3.7	25.9
12850	-3.6	-34.6	-11.4	4	26.3
12900	-3.3	-34.3	-11.1	4.3	26.8
12950	-3	-34	-10.8	4.6	27.2
13000	-2.8	-34	-10.6	4.9	27.8
13050	-2.7	-34.6	-10.7	5.1	28.6
13100	-2.7	-35.2	-10.8	5.4	29.4
13150	-2.6	-35.8	-10.9	5.6	30.2
13200	-2.7	-36.8	-11.2	5.8	31.2
13250	-2.9	-38.1	-11.7	5.9	32.3
13300	-3.1	-39.5	-12.2	6	33.4
13350	-3.3	-40.8	-12.6	6.1	34.5
13400	-3.6	-42.5	-13.3	6.2	35.7
13450	-3.9	-44.4	-14	6.2	36.9
13500	-4.3	-46.2	-14.8	6.2	38.1
13550	-4.6	-48	-15.5	6.2	39.3
13600	-5.1	-50	-16.4	6.2	40.4
13650	-5.6	-52	-17.3	6.1	41.6
13700	-6.1	-54	-18.1	6	42.8
13750	-6.5	-56	-19	5.9	43.9
13800	-7	-57.9	-19.9	5.8	44.9
13850	-7.5	-59.9	-20.8	5.6	46
13900	-8	-61.8	-21.7	5.5	47
13950	-8.5	-63.6	-22.5	5.4	48.1
14000	-8.9	-65.3	-23.2	5.3	49.1
14050	-9.3	-67	-24	5.3	50.2
14100	-9.7	-68.7	-24.8	5.2	51.2
14150	-9.8	-70.1	-25.3	5.4	52.4
14200	-10	-71.4	-25.7	5.5	53.7
14250	-10.1	-72.8	-26.2	5.7	54.9
14300	-10.2	-74.1	-26.6	5.9	56.3
14350	-9.9	-74.9	-26.6	6.6	58
14400	-9.6	-75.8	-26.6	7.2	59.7
14450	-9.3	-76.6	-26.6	7.8	61.4
14500	-8.6	-77.2	-26.3	8.7	63.4
14550	-7.7	-77.4	-25.6	10	65.7
14600	-6.7	-77.7	-25	11.2	68.1
14650	-5.8	-77.9	-24.3	12.5	70.5
14700	-4.2	-77.6	-23.1	14.4	73.4
14750	-2.5	-77.1	-21.7	16.4	76.4
14800	-0.8	-76.6	-20.3	18.4	79.5
14850	0.9	-76.1	-18.9	20.4	82.6
14900	3.4	-74.8	-16.7	23.2	86.3
14950	5.9	-73.6	-14.5	26	90
15000	8.4	-72.4	-12.3	28.8	93.7
15050	11.1	-70.9	-9.8	31.9	97.6
15100	14.3	-69	-6.9	35.4	101.9
15150	17.5	-67.1	-3.9	38.9	106.2
15200	20.8	-65.1	-1	42.4	110.5
15250	24.3	-62.9	2.4	46.3	115
15300	28.2	-60.4	6	50.5	119.8
15350	32	-57.8	9.6	54.6	124.5
15400	35.9	-55.3	13.1	58.7	129.2
15450	40.2	-52.4	17.2	63.3	134.4
15500	44.5	-49.4	21.3	68	139.6
15550	48.9	-46.5	25.4	72.6	144.9
15600	53.3	-43.4	29.6	77.3	150.2
15650	58.1	-40.1	34	82.4	156
15700	62.9	-36.8	38.5	87.5	161.8
15750	67.7	-33.5	43	92.6	167.6
15800	72.6	-30	47.6	97.9	173.7
15850	77.7	-26.3	52.5	103.3	180
15900	82.9	-22.7	57.3	108.8	186.2
15950	88	-19	62.1	114.3	192.5
16000	93.4	-15	67.2	120	199.1
16050	98.9	-11	72.3	125.8	205.7
16100	104.4	-6.9	77.5	131.6	212.3
16150	109.8	-2.8	82.6	137.4	218.9
16200	115.5	1.7	88	143.3	225.5
16250	121.1	6.3	93.3	149.2	232.2
16300	126.8	10.8	98.7	155.2	238.8
16350	132.5	15.5	104.1	161.1	245.3
16400	138.2	20.6	109.6	167	251.6
16450	143.9	25.7	115.1	172.9	257.9
16500	149.7	30.8	120.7	178.9	264.2
16550	155.5	36.2	126.3	184.8	270.3
16600	161.3	42	132.1	190.8	276.4
16650	167.2	47.7	137.8	196.7	282.4
16700	173	53.5	143.6	202.7	288.4
16750	179	59.8	149.6	208.7	294.2
16800	185.1	66.2	155.6	214.7	300.1
16850	191.1	72.7	161.6	220.7	305.9
16900	197.1	79.2	167.7	226.7	311.7
16950	203.2	86.1	173.9	232.7	317.2
17000	209.2	93.1	180.1	238.6	322.7
17050	215.3	100	186.3	244.5	328.2
17100	221.3	107.1	192.5	250.4	333.6
17150	227.2	114.2	198.7	256.1	338.7
17200	233.1	121.4	204.8	261.7	343.8
17250	239	128.5	211	267.4	348.9
17300	244.6	135.4	216.9	272.7	353.6
17350	250.1	142.2	222.7	277.9	358.1
17400	255.5	149	228.4	283	362.6
17450	261	155.8	234.2	288.2	367.2
17500	265.8	161.7	239.3	292.7	371.1
17550	270.5	167.5	244.4	297.1	374.9
17600	275.3	173.4	249.4	301.6	378.8
17650	279.9	179	254.3	305.9	382.6
17700	283.9	183.5	258.5	309.7	386
17750	287.9	188.1	262.7	313.5	389.4
17800	291.9	192.7	266.9	317.3	392.8
17850	295.6	196.6	270.7	320.9	396.1
17900	298.9	199.8	274	324.2	399.3
17950	302.3	203	277.4	327.5	402.5
18000	305.6	206.2	280.7	330.8	405.7
18050	308.7	208.6	283.7	334	409
18100	311.7	210.8	286.6	337.2	412.3
18150	314.7	212.9	289.4	340.3	415.6
18200	317.7	215	292.2	343.5	418.9
18250	320.7	216.6	294.9	346.8	422.5
18300	323.7	218.1	297.5	350.1	426.1
18350	326.7	219.6	300.2	353.3	429.8
18400	329.7	221.1	302.8	356.7	433.5
18450	332.8	222.3	305.5	360.1	437.3
18500	335.8	223.6	308.1	363.5	441.2
18550	338.9	224.9	310.7	367	445.1
18600	341.9	226.2	313.4	370.5	449
18650	345.1	227.5	316.1	374	452.9
18700	348.2	228.8	318.7	377.5	456.8
18750	351.3	230.1	321.4	381	460.7
18800	354.3	231.6	324.1	384.4	464.4
18850	357.4	233	326.8	387.8	468.2
18900	360.4	234.5	329.4	391.2	471.9
18950	363.5	235.9	332.1	394.6	475.6
19000	366.3	237.5	334.7	397.7	479
19050	369.2	239.1	337.2	400.9	482.4
19100	372.1	240.7	339.8	404	485.8
19150	374.8	242.4	342.3	407	489.1
19200	377.5	244.1	344.8	409.8	492.1
19250	380.1	245.8	347.2	412.6	495.2
19300	382.7	247.5	349.6	415.4	498.2
19350	385.1	249.2	351.9	417.9	500.9
19400	387.4	251	354.1	420.3	503.6
19450	389.7	252.8	356.3	422.7	506.2
19500	392	254.6	358.5	425.1	508.8
19550	393.9	256.2	360.4	427.1	511
19600	395.9	257.9	362.4	429	513.2
19650	397.8	259.6	364.3	431	515.4
19700	399.7	261.3	366.1	432.9	517.5
19750	401.3	262.8	367.7	434.4	519.3
19800	402.8	264.3	369.3	436	521.1
19850	404.4	265.8	370.9	437.5	522.9
19900	405.8	267.2	372.4	438.9	524.6
19950	407.1	268.6	373.8	440.1	526.2
20000	408.4	270	375.1	441.4	527.7
20050	409.7	271.4	376.5	442.6	529.2
20100	410.9	272.8	377.7	443.7	530.7
20150	412	274.2	378.9	444.7	532.1
20200	413.1	275.6	380.1	445.8	533.5
20250	414.3	277.1	381.3	446.8	534.9
20300	415.3	278.6	382.4	447.8	536.2
20350	416.4	280.2	383.6	448.7	537.6
20400	417.4	281.7	384.7	449.7	538.9
20450	418.5	283.4	385.8	450.6	540.2
20500	419.5	285.1	387	451.6	541.4
20550	420.6	286.9	388.2	452.5	542.6
20600	421.6	288.7	389.3	453.5	543.8
20650	422.7	290.6	390.5	454.4	544.9
20700	423.8	292.7	391.7	455.4	545.9
20750	424.9	294.7	393	456.3	547
20800	426	296.8	394.2	457.3	548.1
20850	427.2	299.1	395.5	458.3	549
20900	428.3	301.4	396.9	459.2	549.8
20950	429.5	303.8	398.2	460.2	550.7
21000	430.6	306.2	399.6	461.2	551.6
21050	431.8	308.8	401	462.1	552.2
21100	433	311.4	402.4	463	552.8
21150	434.2	313.9	403.8	463.9	553.5
21200	435.3	316.6	405.2	464.8	554
21250	436.4	319.3	406.7	465.7	554.3
21300	437.6	322	408.1	466.5	554.6
21350	438.7	324.7	409.6	467.3	554.9
21400	439.7	327.3	411	468.1	555
21450	440.8	329.9	412.4	468.8	555
21500	441.8	332.6	413.8	469.5	554.9
21550	442.8	335.2	415.2	470.2	554.9
21600	443.7	337.6	416.5	470.7	554.6
21650	444.6	340	417.7	471.3	554.2
21700	445.5	342.3	419	471.8	553.9
21750	446.3	344.6	420.2	472.3	553.5
21800	447	346.5	421.3	472.6	553
21850	447.6	348.4	422.3	473	552.4
21900	448.3	350.2	423.3	473.3	551.9
21950	448.8	351.8	424.1	473.5	551.3
22000	449.1	352.9	424.7	473.6	550.8
22050	449.4	354.1	425.3	473.6	550.2
22100	449.7	355.2	425.9	473.7	549.6
22150	449.8	355.8	426.2	473.6	549
22200	449.7	356.2	426.4	473.4	548.4
22250	449.7	356.6	426.5	473.2	547.8
22300	449.7	356.9	426.7	473	547.2
22350	449.4	356.6	426.5	472.6	546.5
22400	449	356.2	426.2	472.2	545.9
22450	448.7	355.9	426	471.8	545.3
22500	448.3	355.4	425.7	471.3	544.7
22550	447.8	354.6	425.1	470.8	544
22600	447.2	353.8	424.6	470.2	543.2
22650	446.7	353	424.1	469.6	542.5
22700	446.1	352.1	423.5	469	541.7
22750	445.4	351.1	422.8	468.4	540.8
22800	444.8	350.2	422.2	467.8	540
22850	444.1	349.3	421.5	467.1	539.1
22900	443.5	348.4	420.9	466.5	538.3
22950	442.9	347.6	420.3	465.9	537.4
23000	442.4	346.8	419.7	465.4	536.6
23050	441.8	346	419.1	464.8	535.8
23100	441.4	345.5	418.7	464.4	535.2
23150	441	345	418.2	464	534.5
23200	440.5	344.5	417.8	463.7	533.9
23250	440.2	344.1	417.4	463.3	533.4
23300	440	343.9	417.2	463.1	533.1
23350	439.7	343.6	416.9	462.9	532.8
23400	439.5	343.4	416.6	462.7	532.4
23450	439.2	343.2	416.3	462.5	532.3
23500	439	342.9	416.1	462.4	532.1
23550	438.8	342.7	415.8	462.2	532
23600	438.6	342.5	415.5	462	531.9
23650	437.9	341.5	414.7	461.5	531.7
23700	437.2	340.5	413.8	460.9	531.4
23750	436.5	339.5	413	460.3	531.1
23800	435.6	338.1	411.9	459.6	530.7
23850	433.9	335.6	410	458.1	529.9
23900	432.2	333	408	456.7	529.1
23950	430.6	330.5	406.1	455.3	528.3
24000	428.3	327.1	403.4	453.3	527.1
24050	425.5	322.8	400.2	450.8	525.5
24100	422.6	318.5	396.9	448.3	524
24150	419.8	314.3	393.6	445.8	522.4
24200	415.9	308.7	389.2	442.3	520
24250	411.8	302.7	384.6	438.7	517.5
24300	407.7	296.8	380	435	514.9
24350	403.5	290.8	375.2	431.2	512.3
24400	398.3	283.7	369.5	426.5	508.7
24450	393.1	276.7	363.8	421.8	505.1
24500	387.9	269.6	358.1	417.1	501.5
24550	382.5	262.3	352.2	412.1	497.5
24600	376.5	254.7	345.7	406.5	492.8
24650	370.5	247.1	339.3	401	488.1
24700	364.5	239.4	332.9	395.4	483.3
24750	358.1	231.8	326.1	389.2	477.8
24800	351.4	224	319.1	382.8	471.9
24850	344.6	216.3	312.1	376.3	465.9
24900	337.9	208.6	305.2	369.8	459.9
24950	330.6	201.2	297.8	362.6	452.8
25000	323.2	193.8	290.4	355.2	445.4
25050	315.8	186.5	283	347.9	438.1
25100	308.3	179.2	275.6	340.4	430.6
25150	300.5	172.3	268	332.3	422
25200	292.6	165.5	260.5	324.3	413.5
25250	284.8	158.7	252.9	316.3	404.9
25300	276.9	152.2	245.4	308.1	396
25350	269	146	237.9	299.7	386.6
25400	261	139.9	230.4	291.4	377.2
25450	253.1	133.8	222.9	283	367.8
25500	245.6	128.3	215.9	275	358.6
25550	238.2	123	209.1	267.1	349.4
25600	230.8	117.7	202.3	259.3	340.2
25650	223.5	112.5	195.5	251.4	331.1
25700	217.4	108.2	189.9	244.8	323.2
25750	211.3	103.9	184.4	238.2	315.3
25800	205.3	99.6	178.8	231.6	307.5
25850	199.6	95.6	173.6	225.5	300.1
25900	195.1	92.2	169.4	220.6	294.2
25950	190.5	88.8	165.2	215.7	288.3
26000	186	85.4	161	210.7	282.3
26050	182.3	82.4	157.6	206.8	277.6
26100	179.3	79.7	154.8	203.6	273.9
26150	176.4	77.1	152	200.4	270.2
26200	173.4	74.4	149.2	197.3	266.5
26250	171.5	72.2	147.3	195.2	264.2
26300	169.7	70.1	145.6	193.4	262.2
26350	168	68.1	143.8	191.6	260.2
26400	166.3	66	142.2	189.9	258.3
26450	165.3	64.4	141.1	188.9	257.4
26500	164.2	62.8	140	187.9	256.5
26550	163.2	61.2	139	187	255.5
26600	162.4	59.7	138	186.2	254.8
26650	161.8	58.6	137.4	185.6	254.3
26700	161.1	57.5	136.7	185.1	253.8
26750	160.5	56.3	136	184.5	253.3
26800	160	55.6	135.5	184	252.8
26850	159.6	55.1	135	183.6	252.3
26900	159.1	54.6	134.6	183.2	251.8
26950	158.7	54	134.1	182.7	251.3
27000	158.5	54.3	134	182.5	250.8
27050	158.4	54.5	133.9	182.3	250.4
27100	158.2	54.8	133.9	182.1	250
27150	158.2	55.3	133.9	182	249.6
27200	158.6	56.6	134.5	182.3	249.5
27250	159.1	58	135	182.6	249.5
27300	159.5	59.3	135.6	182.9	249.4
27350	160.4	61.2	136.7	183.7	249.8
27400	162	63.8	138.4	185	250.7
27450	163.5	66.4	140.1	186.3	251.5
27500	165	69	141.8	187.6	252.4
27550	167.7	72.7	144.6	190.1	254.4
27600	170.7	76.7	147.9	193	256.8
27650	173.8	80.8	151.1	195.9	259.1
27700	176.9	84.8	154.4	198.8	261.5
27750	181.6	90.2	159.3	203.3	265.6
27800	186.3	95.5	164.2	207.9	269.7
27850	191	100.8	169	212.4	273.7
27900	196.2	106.5	174.3	217.4	278.3
27950	202.4	112.8	180.6	223.4	284
28000	208.5	119.1	186.9	229.5	289.7
28050	214.7	125.4	193.2	235.5	295.4
28100	221.2	131.8	199.7	242	301.6
28150	228	138.3	206.6	248.7	308.2
28200	234.8	144.9	213.4	255.4	314.7
28250	241.5	151.4	220.2	262.1	321.3
28300	248	157.4	226.7	268.6	327.8
28350	254.5	163.3	233.2	275.1	334.4
28400	261	169.2	239.7	281.5	340.9
28450	267.3	175	246	287.9	347.4
28500	272.9	179.9	251.5	293.6	353.5
28550	278.5	184.8	257.1	299.3	359.6
28600	284.1	189.6	262.6	305	365.7
28650	289.2	193.9	267.6	310.2	371.5
28700	293.6	197.4	271.8	314.7	376.8
28750	298	200.8	276	319.3	382.2
28800	302.3	204.3	280.2	323.8	387.6
28850	305.7	206.6	283.3	327.4	392.2
28900	308.5	208.2	285.8	330.6	396.6
28950	311.3	209.9	288.4	333.7	401
29000	314.1	211.6	290.9	336.8	405.4
29050	315.3	211.4	291.7	338.5	408.6
29100	316.3	211	292.4	340	411.8
29150	317.4	210.7	293.1	341.5	415
29200	318.2	210	293.4	342.8	418
29250	317.7	208	292.5	342.9	419.9
29300	317.3	205.9	291.7	343	421.9
29350	316.9	203.9	290.8	343.1	423.9
29400	315.9	201.3	289.3	342.7	425.3
29450	314.2	198	287.2	341.6	426
29500	312.6	194.7	285.1	340.6	426.7
29550	311	191.4	283	339.5	427.5
29600	308.8	187.6	280.3	337.8	427.3
29650	306.4	183.6	277.5	336	426.9
29700	304	179.6	274.7	334.1	426.6
29750	301.6	175.6	271.9	332.2	426.1
29800	299.3	171.9	269.1	330.3	425.3
29850	297	168.2	266.4	328.4	424.4
29900	294.6	164.5	263.7	326.4	423.6
29950	292.6	161.2	261.2	324.7	422.8
30000	291.1	158.7	259.4	323.5	422.1
30050	289.6	156.2	257.6	322.3	421.5
30100	288.1	153.8	255.8	321.1	420.9
30150	287.4	152.3	254.8	320.6	420.7
30200	287.2	151.4	254.3	320.6	420.8
30250	286.9	150.5	253.9	320.5	421
30300	286.7	149.6	253.4	320.4	421.1
30350	287.7	150.2	254.2	321.5	422.1
30400	288.8	150.9	255.2	322.7	423.2
30450	290	151.7	256.2	323.9	424.3
30500	291.2	152.6	257.4	325.2	425.5
30550	293.2	154.5	259.3	327.1	427.2
30600	295.2	156.4	261.3	329.1	428.9
30650	297.2	158.2	263.2	331	430.5
30700	299.3	160.3	265.3	333	432.2
30750	301.4	162.6	267.5	335	433.8
30800	303.6	165	269.7	337	435.4
30850	305.7	167.3	271.9	339	436.9
30900	307.5	169.5	273.9	340.6	438.1
30950	309.2	171.5	275.7	342.1	439
31000	310.8	173.6	277.5	343.5	440
31050	312.5	175.7	279.3	345	440.9
31100	313.2	177.1	280.2	345.5	440.9
31150	313.9	178.4	281.1	345.9	440.8
31200	314.6	179.8	282	346.4	440.7
31250	315	181	282.8	346.7	440.5
31300	315	181.7	282.9	346.4	439.6
31350	314.9	182.5	283.1	346.1	438.8
31400	314.9	183.2	283.3	345.8	438
31450	314.6	183.9	283.4	345.3	436.9
31500	314.2	184.4	283.2	344.7	435.8
31550	313.8	185	283.1	344	434.6
31600	313.5	185.5	283	343.4	433.5
31650	313.2	186.3	283	342.9	432.6
31700	313	187.1	283.1	342.5	431.8
31750	312.9	187.9	283.2	342.1	431
31800	312.7	188.8	283.3	341.8	430.3
31850	313.3	190.3	284	342.1	430.4
31900	313.8	191.9	284.8	342.4	430.5
31950	314.3	193.4	285.5	342.8	430.6
32000	315.1	195.2	286.6	343.4	431.1
32050	316.5	197.5	288.1	344.7	432.3
32100	317.9	199.8	289.7	345.9	433.5
32150	319.3	202	291.2	347.1	434.7
32200	321.2	204.7	293.3	349	436.6
32250	323.5	207.7	295.7	351.2	438.9
32300	325.8	210.7	298.1	353.4	441.2
32350	328.1	213.7	300.5	355.6	443.4
32400	331	217	303.5	358.5	446.4
32450	334	220.5	306.5	361.4	449.4
32500	337	223.9	309.6	364.4	452.4
32550	340.1	227.4	312.7	367.5	455.4
32600	343.5	231	316	370.9	458.7
32650	346.9	234.6	319.4	374.3	461.9
32700	350.3	238.2	322.8	377.7	465.2
32750	353.7	241.7	326.1	381.1	468.4
32800	357.1	245.1	329.4	384.5	471.5
32850	360.4	248.5	332.8	387.9	474.6
32900	363.8	251.9	336.1	391.3	477.7
32950	366.8	254.9	339	394.3	480.4
33000	369.7	257.7	341.9	397.3	483
33050	372.6	260.5	344.7	400.2	485.5
33100	375.5	263.3	347.6	403.1	488.1
33150	377.9	265.5	349.9	405.5	490.3
33200	380.3	267.6	352.2	407.9	492.5
33250	382.6	269.7	354.5	410.3	494.8
33300	384.8	271.7	356.6	412.6	496.9
33350	386.6	273.1	358.3	414.5	499.1
33400	388.5	274.5	360	416.5	501.2
33450	390.3	276	361.7	418.4	503.3
33500	391.9	277.1	363.2	420.1	505.5
33550	393.2	277.8	364.4	421.7	507.6
33600	394.6	278.6	365.6	423.3	509.7
33650	396	279.4	366.8	424.9	511.8
33700	397.1	279.8	367.6	426.2	513.8
33750	398.1	280	368.4	427.5	515.9
33800	399.1	280.2	369.1	428.8	518
33850	400.1	280.4	369.8	430.1	520
33900	400.8	280.2	370.2	431.1	521.9
33950	401.5	279.9	370.6	432.2	523.7
34000	402.2	279.7	371	433.2	525.6
34050	402.8	279.3	371.3	434.2	527.3
34100	403.3	278.7	371.3	435	528.8
34150	403.8	278.1	371.4	435.8	530.3
34200	404.2	277.5	371.5	436.6	531.8
34250	404.6	276.7	371.5	437.3	533.1
34300	404.9	276	371.4	437.9	534.3
34350	405.3	275.2	371.3	438.6	535.5
34400	405.6	274.4	371.2	439.2	536.6
34450	405.9	273.7	371.1	439.7	537.5
34500	406.1	273	371	440.2	538.4
34550	406.4	272.2	370.9	440.7	539.3
34600	406.6	271.5	370.8	441.2	540.1
34650	406.8	270.9	370.7	441.5	540.6
34700	407	270.2	370.5	441.8	541.2
34750	407.1	269.6	370.4	442.1	541.7
34800	407.2	268.9	370.3	442.3	542
34850	407.2	268.3	370.1	442.4	542.2
34900	407.1	267.7	369.9	442.4	542.3
34950	407.1	267.1	369.7	442.4	542.4
35000	406.7	266.4	369.3	442.1	542.2
35050	406.3	265.7	368.9	441.7	541.9
35100	405.9	265	368.4	441.3	541.6
35150	405.5	264.2	368	440.9	541.2
35200	404.6	263.1	367.1	440	540.3
35250	403.6	262	366.2	439	539.4
35300	402.7	260.9	365.4	438	538.6
35350	401.5	259.6	364.3	436.8	537.4
35400	399.7	257.8	362.6	435	535.7
35450	397.9	256	361	433.1	534
35500	396.2	254.2	359.4	431.3	532.3
35550	393.8	251.9	357.2	428.9	530.1
35600	391	249.2	354.5	426.1	527.4
35650	388.3	246.4	351.9	423.3	524.7
35700	385.5	243.7	349.3	420.4	522.1
35750	382	240.2	345.9	416.9	518.7
35800	378.4	236.5	342.4	413.3	515.3
35850	374.7	232.8	338.9	409.7	511.9
35900	371.1	229	335.4	406	508.4
35950	366.9	224.5	331.3	401.9	504.5
36000	362.8	220	327.2	397.8	500.6
36050	358.7	215.5	323.1	393.7	496.8
36100	354.5	210.9	319	389.6	492.9
36150	350.4	206.1	314.8	385.6	489.1
36200	346.2	201.3	310.7	381.5	485.3
36250	342.1	196.5	306.5	377.4	481.4
36300	338.3	191.9	302.7	373.7	477.9
36350	334.6	187.3	299	370.1	474.5
36400	330.9	182.8	295.2	366.6	471.1
36450	327.3	178.3	291.5	363	467.7
36500	324.3	174.4	288.5	360.1	464.9
36550	321.3	170.5	285.4	357.2	462.1
36600	318.3	166.7	282.4	354.3	459.3
36650	315.5	163	279.6	351.6	456.7
36700	313.3	160	277.3	349.5	454.6
36750	311.1	157	275.1	347.3	452.5
36800	309	153.9	272.9	345.2	450.5
36850	307.1	151.3	270.9	343.4	448.7
36900	305.6	149.1	269.4	341.9	447.2
36950	304	146.8	267.8	340.4	445.8
37000	302.5	144.6	266.2	338.9	444.3
37050	301.3	142.8	265	337.7	443.2
37100	300.2	141.1	263.9	336.7	442.2
37150	299.2	139.5	262.7	335.6	441.2
37200	298.1	137.9	261.6	334.6	440.2
37250	297.4	136.7	260.8	333.9	439.6
37300	296.6	135.5	260	333.2	439
37350	295.9	134.3	259.2	332.4	438.3
37400	295.2	133.3	258.5	331.8	437.8
37450	294.7	132.4	257.9	331.3	437.5
37500	294.2	131.5	257.3	330.9	437.2
37550	293.6	130.7	256.7	330.4	436.9
37600	293.2	129.9	256.2	330.1	436.7
37650	292.9	129.2	255.7	329.9	436.7
37700	292.5	128.5	255.2	329.6	436.8
37750	292.2	127.9	254.8	329.4	436.8
37800	292	127.2	254.4	329.4	437.1
37850	291.8	126.6	254	329.4	437.5
37900	291.6	126	253.7	329.4	437.9
37950	291.5	125.5	253.4	329.4	438.3
38000	291.5	125	253.2	329.7	439.1
38050	291.5	124.5	253	330	439.9
38100	291.6	124	252.9	330.2	440.8
38150	291.7	123.5	252.8	330.6	441.8
38200	292	123.1	252.8	331.2	443
38250	292.3	122.8	252.9	331.7	444.3
38300	292.6	122.4	252.9	332.3	445.6
38350	293.1	122.1	253.1	333	447.1
38400	293.6	121.8	253.4	333.8	448.7
38450	294.2	121.5	253.6	334.6	450.2
38500	294.7	121.2	253.9	335.4	451.8
38550	295.4	121	254.2	336.3	453.6
38600	296	120.8	254.6	337.3	455.3
38650	296.7	120.5	255	338.2	457
38700	297.4	120.3	255.4	339.1	458.7
38750	298	120.1	255.8	340.1	460.4
38800	298.7	119.9	256.2	341	462.1
38850	299.4	119.7	256.6	341.9	463.8
38900	300	119.5	257	342.8	465.4
38950	300.6	119.3	257.3	343.6	466.9
39000	301.2	119	257.6	344.4	468.5
39050	301.7	118.8	257.9	345.1	470
39100	302.1	118.6	258.1	345.7	471.3
39150	302.4	118.3	258.2	346.2	472.6
39200	302.7	118	258.3	346.8	473.9
39250	303	117.7	258.4	347.3	475.2
39300	303.1	117.3	258.3	347.5	476.4
39350	303.1	116.9	258.2	347.7	477.5
39400	303.1	116.5	258.1	347.9	478.7
39450	303.1	116.1	257.9	348.1	479.9
39500	303.1	115.7	257.7	348.2	481.1
39550	303	115.2	257.4	348.4	482.3
39600	302.9	114.8	257.2	348.5	483.6
39650	302.9	114.4	257	348.8	485
39700	303	114	256.9	349.1	486.5
39750	303.1	113.6	256.7	349.5	488
39800	303.1	113.2	256.5	349.8	489.5
39850	303.4	112.9	256.5	350.4	491.2
39900	303.7	112.6	256.5	351	492.9
39950	303.9	112.3	256.5	351.6	494.6
40000	304.2	112	256.5	352.3	496.4
40050	304.7	111.8	256.6	353.1	498.2
40100	305.2	111.6	256.7	353.9	500
40150	305.6	111.4	256.9	354.8	501.8
40200	306.1	111.2	257	355.6	503.5
40250	306.6	111	257.2	356.4	505.1
40300	307.1	110.8	257.3	357.3	506.8
40350	307.6	110.7	257.5	358.1	508.4
40400	308	110.4	257.5	358.8	509.8
40450	308.3	110.2	257.6	359.4	511.1
40500	308.7	110	257.6	360.1	512.4
40550	309	109.8	257.6	360.7	513.7
40600	309.2	109.5	257.4	361.1	514.6
40650	309.3	109.2	257.3	361.5	515.5
40700	309.4	109	257.2	361.8	516.4
40750	309.5	108.7	257	362.2	517.2
40800	309.4	108.4	256.8	362.3	517.8
40850	309.4	108.2	256.6	362.4	518.3
40900	309.3	107.9	256.3	362.5	518.9
40950	309.2	107.7	256.1	362.6	519.3
41000	309.1	107.6	255.9	362.6	519.7
41050	308.9	107.5	255.8	362.6	520.1
41100	308.8	107.4	255.6	362.6	520.5
41150	308.8	107.6	255.6	362.7	521
41200	308.8	107.8	255.6	362.7	521.5
41250	308.8	108.1	255.6	362.8	522
41300	308.8	108.4	255.7	362.9	522.5
41350	309.1	109.2	256.2	363.2	523.1
41400	309.4	110	256.7	363.5	523.7
41450	309.7	110.8	257.1	363.8	524.4
41500	310.2	111.9	257.8	364.3	525.1
41550	311.1	113.5	259	365	525.9
41600	311.9	115.1	260.1	365.7	526.7
41650	312.8	116.7	261.2	366.5	527.6
41700	314	118.9	262.7	367.4	528.3
41750	315.4	121.4	264.5	368.6	529.1
41800	316.8	123.9	266.3	369.7	529.8
41850	318.2	126.4	268.1	370.8	530.5
41900	320	129.7	270.4	372.2	531
41950	321.9	133.1	272.8	373.7	531.3
42000	323.8	136.4	275.2	375.1	531.7
42050	325.8	139.9	277.7	376.5	532
42100	327.9	143.9	280.5	378	531.9
42150	330	147.9	283.2	379.5	531.8
42200	332.1	151.8	285.9	381	531.7
42250	334.2	155.9	288.7	382.4	531.4
42300	336.3	160.1	291.4	383.7	530.7
42350	338.4	164.3	294.1	385	530.1
42400	340.5	168.5	296.9	386.3	529.5
42450	342.4	172.7	299.5	387.4	528.5
42500	344.2	176.8	302	388.5	527.5
42550	346.1	180.9	304.6	389.5	526.4
42600	348	184.9	307.1	390.5	525.3
42650	349.6	188.7	309.4	391.3	524.1
42700	351.2	192.4	311.6	392.1	522.8
42750	352.7	196.1	313.9	392.9	521.5
42800	354.3	199.7	316	393.6	520.3
42850	355.7	203	318	394.3	519.2
42900	357.1	206.2	320	395	518.1
42950	358.5	209.5	322	395.7	516.9
43000	359.9	212.4	323.9	396.4	516.2
43050	361.2	215.2	325.7	397.3	515.6
43100	362.6	217.9	327.5	398.1	515.1
43150	364	220.7	329.3	398.9	514.5
43200	365.5	223.2	331.1	400	514.6
43250	367	225.6	332.9	401.2	514.7
43300	368.5	228.1	334.7	402.4	514.9
43350	370	230.5	336.5	403.6	515.1
43400	371.8	232.9	338.5	405.2	516
43450	373.6	235.3	340.4	406.8	516.9
43500	375.4	237.6	342.4	408.5	517.7
43550	377.3	240	344.4	410.2	518.8
43600	379.3	242.3	346.5	412.2	520.3
43650	381.3	244.6	348.6	414.2	521.7
43700	383.4	246.8	350.6	416.2	523.1
43750	385.5	249.1	352.8	418.3	524.7
43800	387.7	251.3	354.9	420.5	526.4
43850	389.8	253.4	357	422.7	528.1
43900	392	255.6	359.2	424.9	529.8
43950	394.2	257.6	361.3	427.2	531.7
44000	396.4	259.6	363.4	429.4	533.6
44050	398.5	261.7	365.5	431.6	535.5
44100	400.7	263.6	367.5	433.8	537.4
44150	402.7	265.4	369.5	436	539.3
44200	404.7	267.1	371.4	438.1	541.3
44250	406.8	268.9	373.3	440.2	543.2
44300	408.7	270.5	375.2	442.2	545.2
44350	410.6	272	376.9	444.1	547.1
44400	412.4	273.5	378.7	446.1	549.1
44450	414.3	275	380.4	448	551
44500	416	276.4	382	449.8	553
44550	417.7	277.7	383.6	451.5	554.9
44600	419.3	279	385.2	453.2	556.8
44650	421	280.3	386.7	454.9	558.7
44700	422.4	281.4	388.1	456.4	560.4
44750	423.9	282.6	389.4	457.8	562.2
44800	425.3	283.7	390.8	459.3	563.9
44850	426.7	284.8	392.1	460.7	565.5
44900	427.9	285.9	393.2	461.9	567
44950	429.1	286.9	394.3	463.1	568.4
45000	430.3	288	395.5	464.3	569.8
45050	431.4	288.9	396.5	465.3	571
45100	432.3	289.9	397.4	466.2	572
45150	433.3	290.8	398.3	467.2	573
45200	434.2	291.8	399.3	468.1	574.1
45250	434.9	292.6	399.9	468.7	574.7
45300	435.6	293.4	400.6	469.3	575.2
45350	436.3	294.2	401.3	469.9	575.8
45400	436.9	295	401.9	470.5	576.2
45450	437.2	295.7	402.3	470.8	576.3
45500	437.6	296.3	402.7	471.1	576.3
45550	438	297	403.1	471.4	576.3
45600	438.2	297.6	403.3	471.6	576.2
45650	438.3	298.1	403.5	471.6	575.7
45700	438.4	298.6	403.7	471.6	575.2
45750	438.5	299.1	403.8	471.5	574.7
45800	438.4	299.6	403.9	471.4	574
45850	438.3	300.1	403.9	471.2	573.1
45900	438.2	300.5	403.9	471	572.2
45950	438.1	301	403.9	470.8	571.3
46000	437.9	301.5	403.9	470.5	570.2
46050	437.7	302	403.9	470.1	569
46100	437.6	302.5	403.9	469.8	567.9
46150	437.4	303	403.9	469.5	566.7
46200	437.2	303.5	403.9	469.2	565.5
46250	437	304.1	403.9	468.9	564.4
46300	436.9	304.6	404	468.6	563.2
46350	436.7	305.1	404	468.3	562.1
46400	436.6	305.5	404.1	468.1	561.2
46450	436.5	305.9	404.2	467.9	560.3
46500	436.4	306.3	404.2	467.7	559.3
46550	436.4	306.5	404.3	467.7	558.8
46600	436.4	306.6	404.3	467.6	558.3
46650	436.3	306.7	404.4	467.6	557.9
46700	436.3	306.8	404.4	467.6	557.5
46750	436.3	306.4	404.3	467.8	557.8
46800	436.4	305.9	404.2	467.9	558.1
46850	436.4	305.5	404.1	468.1	558.3
46900	436.4	304.8	403.9	468.3	558.9
46950	436.3	303.6	403.5	468.6	559.8
47000	436.3	302.4	403.2	468.9	560.7
47050	436.2	301.2	402.8	469.1	561.7
47100	436.1	299.5	402.2	469.4	562.9
47150	435.8	297.4	401.4	469.6	564.4
47200	435.6	295.4	400.7	469.9	565.9
47250	435.4	293.4	399.9	470.1	567.4
47300	435.1	290.8	399	470.4	569.2
47350	434.7	288.2	398	470.6	571
47400	434.4	285.6	397	470.8	572.8
47450	434.1	282.9	396	471	574.7
47500	433.7	280	394.9	471.2	576.8
47550	433.3	277	393.8	471.4	578.8
47600	432.9	274.1	392.7	471.6	580.9
47650	432.5	271	391.6	471.8	583
47700	432.1	267.9	390.5	472	585.2
47750	431.7	264.8	389.4	472.2	587.3
47800	431.3	261.7	388.2	472.4	589.5
47850	430.9	258.6	387.1	472.7	591.8
47900	430.5	255.4	386	472.9	594
47950	430.1	252.2	384.9	473.1	596.3
48000	429.7	249.1	383.8	473.4	598.5

## Sheet: ∆t CLIM2
Age_yrsb2k	∆years_(Hulu_minus_GICC05)	0.05	0.32	0.68	0.95
10750	-43.6	-56.3	-47.1	-39.7	-30.5
10800	-43.3	-55.9	-46.8	-39.3	-30
10850	-42.9	-55.5	-46.4	-38.9	-29.6
10900	-42.5	-55.2	-46	-38.5	-29.1
10950	-42.1	-54.8	-45.6	-38.1	-28.7
11000	-41.6	-54.3	-45.1	-37.6	-28.1
11050	-41.1	-53.9	-44.6	-37.1	-27.6
11100	-40.6	-53.4	-44.1	-36.6	-27
11150	-40	-52.9	-43.6	-36	-26.3
11200	-39.4	-52.3	-42.9	-35.3	-25.6
11250	-38.7	-51.8	-42.2	-34.6	-24.8
11300	-38	-51.2	-41.6	-33.9	-24
11350	-37.1	-50.4	-40.7	-32.9	-22.9
11400	-36.1	-49.6	-39.7	-31.9	-21.8
11450	-35.1	-48.7	-38.7	-30.8	-20.6
11500	-34	-47.9	-37.7	-29.7	-19.4
11550	-32.6	-46.8	-36.4	-28.2	-17.8
11600	-31.2	-45.7	-35.1	-26.8	-16.1
11650	-29.8	-44.5	-33.7	-25.3	-14.5
11700	-28.3	-43.4	-32.3	-23.7	-12.8
11750	-26.7	-42.2	-30.8	-22	-10.8
11800	-25.1	-40.9	-29.2	-20.3	-8.9
11850	-23.4	-39.7	-27.7	-18.6	-7
11900	-21.8	-38.5	-26.2	-16.8	-5
11950	-20.2	-37.4	-24.7	-15.1	-3
12000	-18.7	-36.3	-23.3	-13.4	-1.1
12050	-17.1	-35.2	-21.8	-11.7	0.9
12100	-15.7	-34.2	-20.5	-10.2	2.6
12150	-14.3	-33.2	-19.3	-8.8	4.3
12200	-13	-32.3	-18	-7.3	6
12250	-11.7	-31.4	-16.8	-5.9	7.5
12300	-10.8	-30.6	-16	-4.9	8.7
12350	-9.8	-29.8	-15.1	-3.9	9.8
12400	-8.9	-29.1	-14.2	-2.9	11
12450	-8.1	-28.4	-13.5	-2.1	11.9
12500	-7.5	-27.7	-12.9	-1.4	12.5
12550	-6.9	-27.1	-12.3	-0.8	13.1
12600	-6.3	-26.4	-11.7	-0.2	13.8
12650	-5.9	-25.9	-11.3	0.3	14.1
12700	-5.5	-25.4	-10.9	0.6	14.4
12750	-5.2	-24.9	-10.6	1	14.7
12800	-4.8	-24.5	-10.2	1.3	15
12850	-4.8	-24.5	-10.3	1.4	15.1
12900	-4.8	-24.4	-10.3	1.4	15.2
12950	-4.8	-24.4	-10.3	1.5	15.3
13000	-4.9	-24.7	-10.5	1.5	15.4
13050	-5.3	-25.5	-11.1	1.3	15.6
13100	-5.7	-26.3	-11.6	1	15.7
13150	-6.1	-27.1	-12.2	0.8	15.8
13200	-6.8	-28.3	-13	0.3	15.9
13250	-7.6	-29.9	-14.1	-0.2	16
13300	-8.4	-31.4	-15.2	-0.8	16
13350	-9.3	-33	-16.2	-1.4	16
13400	-10.4	-35	-17.7	-2.3	15.9
13450	-11.7	-37.1	-19.2	-3.2	15.7
13500	-12.9	-39.1	-20.7	-4.2	15.5
13550	-14.2	-41.3	-22.2	-5.1	15.3
13600	-15.7	-43.6	-24	-6.4	14.9
13650	-17.2	-45.9	-25.8	-7.6	14.4
13700	-18.7	-48.3	-27.6	-8.9	13.9
13750	-20.3	-50.6	-29.4	-10.2	13.3
13800	-21.9	-53	-31.2	-11.6	12.5
13850	-23.5	-55.3	-33.1	-13	11.7
13900	-25.2	-57.6	-34.9	-14.4	11
13950	-26.7	-59.8	-36.7	-15.7	10.2
14000	-28.3	-61.9	-38.4	-17.1	9.3
14050	-29.8	-64	-40.1	-18.4	8.5
14100	-31.3	-66.1	-41.7	-19.7	7.6
14150	-32.4	-67.8	-43	-20.7	7
14200	-33.5	-69.5	-44.3	-21.7	6.5
14250	-34.7	-71.1	-45.5	-22.7	5.9
14300	-35.6	-72.6	-46.6	-23.5	5.5
14350	-36	-73.5	-47.1	-23.7	5.6
14400	-36.3	-74.5	-47.6	-23.9	5.7
14450	-36.7	-75.4	-48.1	-24.2	5.8
14500	-36.6	-75.8	-48	-23.9	6.5
14550	-35.9	-75.7	-47.5	-23	7.7
14600	-35.2	-75.6	-47	-22.2	8.9
14650	-34.6	-75.5	-46.4	-21.4	10.1
14700	-33.1	-74.6	-45.1	-19.8	12.1
14750	-31.4	-73.5	-43.5	-17.9	14.4
14800	-29.7	-72.4	-42	-16	16.8
14850	-28	-71.3	-40.4	-14.1	19.1
14900	-25.4	-69.3	-37.9	-11.3	22.4
14950	-22.8	-67.3	-35.4	-8.5	25.8
15000	-20.2	-65.3	-33	-5.7	29.1
15050	-17.3	-63	-30.2	-2.6	32.7
15100	-14	-60.3	-27	0.9	36.8
15150	-10.6	-57.6	-23.8	4.5	40.9
15200	-7.3	-54.8	-20.6	8	45.1
15250	-3.6	-51.8	-17.1	11.9	49.6
15300	0.3	-48.6	-13.3	16.1	54.3
15350	4.2	-45.3	-9.5	20.2	59.1
15400	8.1	-42.1	-5.7	24.3	63.8
15450	12.4	-38.7	-1.6	28.8	68.9
15500	16.7	-35.2	2.5	33.4	74.1
15550	21.1	-31.8	6.7	38	79.3
15600	25.4	-28.3	10.9	42.6	84.5
15650	30	-24.9	15.3	47.4	89.9
15700	34.7	-21.5	19.7	52.3	95.4
15750	39.3	-18.1	24.2	57.2	100.9
15800	44	-14.8	28.6	62.2	106.4
15850	48.8	-11.5	33.2	67.3	112.2
15900	53.6	-8.3	37.7	72.5	117.9
15950	58.5	-5	42.3	77.6	123.7
16000	63.4	-1.8	46.9	82.9	129.6
16050	68.3	1.3	51.5	88.2	135.6
16100	73.3	4.4	56.1	93.5	141.6
16150	78.3	7.5	60.7	98.8	147.6
16200	83.2	10.4	65.2	104.1	153.7
16250	88.1	13.4	69.7	109.4	159.7
16300	93	16.3	74.1	114.8	165.8
16350	97.8	19.3	78.6	120	171.8
16400	102.5	22.1	82.9	125.1	177.8
16450	107.3	24.9	87.1	130.2	183.7
16500	112	27.7	91.4	135.3	189.6
16550	116.6	30.5	95.6	140.3	195.5
16600	121.1	33.2	99.7	145.2	201.3
16650	125.6	35.9	103.8	150.1	207
16700	130.1	38.7	107.8	155.1	212.8
16750	134.5	41.4	111.8	159.8	218.5
16800	138.8	44.1	115.8	164.5	224.1
16850	143.1	46.8	119.7	169.2	229.7
16900	147.4	49.5	123.6	173.9	235.2
16950	151.5	52.2	127.4	178.3	240.6
17000	155.5	54.9	131.1	182.7	246
17050	159.6	57.6	134.8	187.1	251.3
17100	163.6	60.3	138.5	191.4	256.5
17150	167.3	62.9	141.9	195.5	261.6
17200	171	65.6	145.4	199.6	266.6
17250	174.7	68.2	148.9	203.6	271.6
17300	178.3	70.8	152.2	207.5	276.4
17350	181.7	73.3	155.5	211.3	281.1
17400	185.1	75.9	158.7	215.1	285.8
17450	188.6	78.4	162	218.8	290.5
17500	191.9	80.9	165.1	222.4	295
17550	195.1	83.3	168.2	226	299.5
17600	198.4	85.8	171.3	229.6	304
17650	201.7	88.2	174.4	233.2	308.5
17700	205.1	90.8	177.7	236.8	312.9
17750	208.5	93.4	180.9	240.4	317.4
17800	211.9	96	184.1	244	321.8
17850	215.4	98.8	187.4	247.7	326.3
17900	219.1	101.8	191	251.6	331
17950	222.8	104.8	194.5	255.4	335.6
18000	226.5	107.8	198	259.3	340.2
18050	230.5	111.1	201.8	263.4	345
18100	234.5	114.6	205.7	267.5	349.8
18150	238.6	118.1	209.6	271.6	354.6
18200	242.6	121.6	213.4	275.7	359.4
18250	247	125.6	217.6	280.1	364.3
18300	251.3	129.5	221.8	284.4	369.2
18350	255.6	133.5	226	288.8	374.1
18400	260	137.6	230.2	293.2	379
18450	264.4	141.9	234.5	297.6	383.8
18500	268.8	146.3	238.8	302	388.6
18550	273.2	150.6	243.1	306.5	393.5
18600	277.6	155.1	247.3	310.9	398.2
18650	281.8	159.6	251.5	315.2	402.8
18700	286.1	164.1	255.7	319.6	407.4
18750	290.4	168.6	259.9	324	412.1
18800	294.4	173	263.9	328.1	416.4
18850	298.4	177.4	267.8	332.2	420.6
18900	302.4	181.7	271.7	336.3	424.9
18950	306.3	186	275.6	340.4	429
19000	309.8	189.9	279.1	344.1	432.8
19050	313.3	193.7	282.6	347.8	436.5
19100	316.9	197.6	286.1	351.5	440.2
19150	320.2	201.2	289.4	355	443.7
19200	323.2	204.5	292.4	358.2	446.9
19250	326.3	207.8	295.4	361.4	450
19300	329.3	211.1	298.5	364.6	453.1
19350	332.1	214.1	301.2	367.5	455.7
19400	334.6	216.9	303.7	370.2	458.1
19450	337.2	219.6	306.3	372.9	460.5
19500	339.8	222.4	308.8	375.7	462.9
19550	341.8	224.6	310.9	377.8	464.5
19600	343.8	226.7	312.9	379.8	466
19650	345.8	228.9	314.8	381.9	467.5
19700	347.7	230.9	316.7	383.8	468.8
19750	349.1	232.4	318.1	385.2	469.3
19800	350.5	233.9	319.4	386.5	469.9
19850	351.8	235.4	320.8	387.9	470.4
19900	353	236.7	322	389	470.6
19950	353.9	237.7	322.8	389.7	470.5
20000	354.8	238.7	323.7	390.5	470.3
20050	355.7	239.8	324.6	391.3	470.2
20100	356.3	240.6	325.3	391.7	469.7
20150	356.8	241.3	325.8	392.1	469.2
20200	357.3	242.1	326.4	392.4	468.7
20250	357.9	242.8	327	392.7	468.1
20300	358	243.3	327.2	392.7	467.3
20350	358.2	243.8	327.5	392.6	466.5
20400	358.3	244.3	327.7	392.6	465.7
20450	358.3	244.7	327.8	392.4	464.8
20500	358.1	245	327.7	391.9	463.7
20550	357.8	245.2	327.6	391.5	462.6
20600	357.6	245.5	327.5	391	461.6
20650	357.1	245.5	327.2	390.4	460.3
20700	356.4	245.5	326.7	389.6	459
20750	355.7	245.4	326.2	388.7	457.7
20800	355.1	245.3	325.7	387.9	456.4
20850	354.1	244.9	324.9	386.8	454.9
20900	353	244.4	324	385.6	453.3
20950	352	244	323.1	384.5	451.8
21000	350.9	243.4	322.2	383.3	450.2
21050	349.5	242.5	320.9	381.8	448.4
21100	348.1	241.6	319.6	380.3	446.6
21150	346.7	240.6	318.3	378.8	444.7
21200	345.2	239.5	317	377.2	442.9
21250	343.5	238.2	315.4	375.4	440.9
21300	341.8	236.8	313.8	373.7	438.9
21350	340.1	235.4	312.2	371.9	436.9
21400	338.4	233.9	310.5	370.1	434.9
21450	336.6	232.4	308.8	368.3	432.9
21500	334.8	230.8	307.1	366.5	430.9
21550	333.1	229.2	305.3	364.7	428.9
21600	331.4	227.7	303.7	363	427.1
21650	329.7	226.1	302	361.3	425.3
21700	328	224.5	300.3	359.7	423.6
21750	326.4	223	298.7	358	421.9
21800	324.8	221.5	297.1	356.5	420.4
21850	323.3	220	295.5	355	418.9
21900	321.7	218.6	294	353.5	417.4
21950	320.3	217.1	292.4	352	416.1
22000	318.8	215.8	291	350.7	415
22050	317.4	214.5	289.5	349.3	413.8
22100	316	213.1	288	347.9	412.6
22150	314.7	211.9	286.7	346.7	411.7
22200	313.5	210.8	285.3	345.5	410.8
22250	312.2	209.6	284	344.3	409.9
22300	311	208.5	282.7	343.2	409
22350	309.9	207.6	281.5	342.2	408.3
22400	308.8	206.7	280.3	341.2	407.7
22450	307.8	205.8	279.2	340.2	407
22500	306.7	205	278	339.3	406.3
22550	305.7	204.3	277	338.4	405.7
22600	304.7	203.6	276	337.4	405.1
22650	303.7	203	274.9	336.5	404.5
22700	302.8	202.4	273.9	335.6	403.8
22750	301.8	201.9	273	334.6	403.2
22800	300.8	201.4	272.1	333.6	402.5
22850	299.9	200.9	271.1	332.6	401.8
22900	299	200.5	270.3	331.6	401.1
22950	298.1	200.2	269.5	330.6	400.4
23000	297.2	199.8	268.7	329.6	399.7
23050	296.4	199.5	267.9	328.7	399
23100	295.6	199.2	267.3	327.8	398.3
23150	294.9	198.9	266.7	326.9	397.6
23200	294.2	198.6	266.1	326.1	397
23250	293.6	198.3	265.5	325.3	396.3
23300	293.1	197.9	265.1	324.6	395.7
23350	292.6	197.6	264.7	323.9	395.1
23400	292	197.3	264.2	323.2	394.6
23450	291.6	196.8	263.9	322.7	394.1
23500	291.2	196.3	263.6	322.2	393.6
23550	290.9	195.8	263.3	321.7	393.1
23600	290.5	195.2	263	321.2	392.6
23650	290.1	194.5	262.6	320.7	392.2
23700	289.7	193.7	262.2	320.3	391.8
23750	289.3	192.9	261.9	319.8	391.4
23800	288.9	192	261.4	319.3	391
23850	288.2	190.9	260.8	318.6	390.5
23900	287.6	189.8	260.2	318	390
23950	287	188.7	259.6	317.4	389.5
24000	286.2	187.4	258.8	316.6	388.9
24050	285.3	185.9	257.8	315.6	388.2
24100	284.3	184.4	256.8	314.7	387.5
24150	283.4	182.9	255.9	313.8	386.8
24200	282.1	181	254.5	312.5	385.7
24250	280.7	179.1	253	311.1	384.6
24300	279.4	177.2	251.6	309.8	383.5
24350	278	175.2	250.1	308.4	382.3
24400	276.1	172.8	248.1	306.6	380.5
24450	274.2	170.5	246.1	304.7	378.8
24500	272.3	168.1	244.1	302.9	377.1
24550	270.3	165.6	241.9	300.9	375.1
24600	267.9	162.8	239.4	298.5	372.8
24650	265.5	160	236.8	296.2	370.4
24700	263.1	157.3	234.3	293.8	368
24750	260.4	154.3	231.5	291.2	365.3
24800	257.6	151.3	228.5	288.5	362.5
24850	254.8	148.3	225.6	285.8	359.6
24900	252	145.3	222.7	283	356.8
24950	249	142.2	219.6	280	353.7
25000	245.9	139.1	216.5	277.1	350.7
25050	242.9	136.1	213.4	274.1	347.6
25100	239.8	133	210.3	271.1	344.5
25150	236.6	129.9	207.2	268	341.3
25200	233.5	126.9	204.1	264.9	338.2
25250	230.4	123.9	201	261.8	335
25300	227.3	120.9	198	258.8	331.9
25350	224.2	118	195	255.7	328.7
25400	221.1	115.1	192.1	252.7	325.6
25450	218.1	112.1	189.1	249.7	322.5
25500	215.2	109.4	186.4	246.9	319.5
25550	212.5	106.8	183.8	244.1	316.5
25600	209.7	104.2	181.2	241.3	313.6
25650	207	101.6	178.6	238.6	310.6
25700	204.8	99.4	176.5	236.2	308
25750	202.5	97.2	174.4	233.9	305.4
25800	200.3	95.1	172.3	231.5	302.7
25850	198.2	93.1	170.3	229.3	300.2
25900	196.6	91.5	168.8	227.5	298
25950	194.9	89.9	167.3	225.6	295.8
26000	193.3	88.4	165.8	223.8	293.6
26050	191.9	87.2	164.6	222.2	291.6
26100	190.9	86.4	163.7	220.9	289.9
26150	189.8	85.5	162.7	219.6	288.1
26200	188.7	84.6	161.8	218.3	286.4
26250	188	84.3	161.2	217.3	284.9
26300	187.3	84.1	160.7	216.3	283.5
26350	186.6	83.8	160.2	215.4	282
26400	185.9	83.6	159.7	214.4	280.6
26450	185.4	83.9	159.4	213.6	279.3
26500	184.9	84.2	159.1	212.8	278
26550	184.4	84.4	158.9	212	276.6
26600	184	84.8	158.6	211.3	275.4
26650	183.6	85.5	158.5	210.6	274.2
26700	183.2	86.1	158.4	209.9	273
26750	182.8	86.8	158.3	209.2	271.8
26800	182.5	87.7	158.4	208.7	270.8
26850	182.3	88.7	158.5	208.2	269.8
26900	182.1	89.6	158.6	207.7	268.9
26950	181.9	90.6	158.6	207.2	267.9
27000	182.1	92.1	159.2	207.2	267.5
27050	182.4	93.6	159.8	207.2	267.1
27100	182.7	95.1	160.4	207.3	266.8
27150	183.2	96.8	161.1	207.5	266.6
27200	184.4	99.1	162.6	208.5	267.2
27250	185.6	101.4	164	209.5	267.8
27300	186.7	103.7	165.5	210.4	268.4
27350	188.6	106.6	167.6	212.1	269.6
27400	191.1	110	170.3	214.5	271.6
27450	193.6	113.5	173	216.8	273.6
27500	196.2	116.9	175.8	219.2	275.6
27550	199.9	121.4	179.6	222.8	278.9
27600	204	126.2	183.9	226.9	282.5
27650	208.1	131	188.1	230.9	286.2
27700	212.3	135.9	192.4	235	289.9
27750	217.6	141.7	197.8	240.3	294.8
27800	223	147.6	203.2	245.6	299.7
27850	228.3	153.4	208.6	250.9	304.7
27900	233.8	159.4	214.2	256.4	309.8
27950	239.8	165.7	220.2	262.3	315.4
28000	245.8	172	226.2	268.3	321.1
28050	251.8	178.4	232.3	274.3	326.7
28100	257.7	184.5	238.2	280.2	332.3
28150	263.6	190.6	244.1	286	337.9
28200	269.5	196.6	250	291.9	343.5
28250	275.4	202.6	255.9	297.8	349.1
28300	280.6	207.8	261.1	303	354.1
28350	285.6	212.9	266.2	308.1	359.1
28400	290.7	217.9	271.3	313.2	364.1
28450	295.7	222.8	276.2	318.1	368.9
28500	299.8	226.6	280.3	322.4	373.2
28550	304	230.3	284.4	326.6	377.6
28600	308.1	234	288.5	330.8	381.9
28650	311.8	237.2	292.1	334.6	385.9
28700	315	239.5	295.2	337.9	389.6
28750	318.2	241.7	298.2	341.2	393.3
28800	321.3	244	301.2	344.5	396.9
28850	323.7	245.2	303.3	347.1	400.1
28900	325.7	245.8	305	349.3	403
28950	327.6	246.4	306.7	351.5	405.9
29000	329.6	247.1	308.4	353.7	408.8
29050	330.3	246.1	308.8	354.8	410.9
29100	330.9	245.1	309	355.7	412.8
29150	331.5	244.1	309.3	356.7	414.8
29200	331.8	242.7	309.2	357.4	416.6
29250	331.3	240.4	308.3	357.3	417.7
29300	330.7	238.1	307.3	357.2	418.8
29350	330.2	235.8	306.4	357.2	419.9
29400	329.2	233	305	356.7	420.6
29450	327.8	229.9	303.1	355.8	420.8
29500	326.4	226.7	301.3	354.9	421.1
29550	325	223.6	299.4	354	421.4
29600	323.1	220.2	297.2	352.7	421.2
29650	321.2	216.7	294.8	351.3	420.8
29700	319.3	213.2	292.5	349.9	420.4
29750	317.3	209.7	290.1	348.5	420
29800	315.4	206.5	287.8	347	419.4
29850	313.5	203.2	285.5	345.5	418.7
29900	311.5	200	283.1	344.1	418
29950	309.8	197	281	342.7	417.4
30000	308.3	194.5	279.2	341.6	416.9
30050	306.9	192	277.4	340.6	416.4
30100	305.5	189.5	275.7	339.5	415.9
30150	304.5	187.7	274.4	338.7	415.6
30200	303.7	186.2	273.4	338.2	415.4
30250	303	184.8	272.5	337.7	415.2
30300	302.3	183.3	271.5	337.3	415.1
30350	302.2	182.9	271.3	337.3	415.3
30400	302.3	182.7	271.2	337.4	415.6
30450	302.3	182.4	271.1	337.6	415.9
30500	302.4	182.2	271.1	337.7	416.1
30550	302.8	182.7	271.5	338.1	416.5
30600	303.2	183.2	271.9	338.5	416.8
30650	303.6	183.7	272.3	338.9	417.2
30700	303.9	184.3	272.6	339.1	417.3
30750	304.2	185	273	339.2	417.2
30800	304.4	185.8	273.3	339.4	417.1
30850	304.7	186.5	273.7	339.5	417
30900	304.6	187.2	273.7	339.2	416.4
30950	304.3	187.8	273.6	338.6	415.5
31000	304.1	188.4	273.6	338.1	414.6
31050	303.8	189.1	273.5	337.6	413.7
31100	302.8	189.3	272.7	336.3	411.7
31150	301.7	189.5	272	334.9	409.8
31200	300.7	189.7	271.2	333.5	407.8
31250	299.4	189.9	270.3	332	405.6
31300	297.8	189.7	269	330	402.8
31350	296.1	189.6	267.7	327.9	400
31400	294.5	189.5	266.4	325.9	397.2
31450	292.7	189.2	265.1	323.8	394.2
31500	290.9	188.9	263.6	321.5	391.1
31550	289.1	188.6	262.2	319.3	387.9
31600	287.3	188.2	260.7	317.1	384.8
31650	285.8	188.1	259.7	315.2	382
31700	284.5	188.1	258.7	313.5	379.4
31750	283.1	188	257.7	311.8	376.8
31800	281.9	188	256.8	310.1	374.3
31850	281.6	188.6	256.8	309.5	373
31900	281.4	189.2	256.8	309	371.7
31950	281.1	189.9	256.8	308.4	370.3
32000	281.3	190.7	257.2	308.2	369.5
32050	282.1	191.9	258.1	308.9	369.7
32100	282.9	193.2	259.1	309.5	369.8
32150	283.7	194.4	260.1	310.1	369.9
32200	285	196	261.5	311.3	370.8
32250	286.6	197.7	263.2	312.9	372.3
32300	288.3	199.4	264.9	314.5	373.7
32350	289.9	201.1	266.6	316.1	375.1
32400	292	203	268.7	318.3	377.3
32450	294.2	204.8	270.8	320.5	379.7
32500	296.3	206.7	272.9	322.8	382
32550	298.5	208.5	275.1	325	384.5
32600	300.8	210.3	277.3	327.5	387.3
32650	303.2	212	279.5	330	390.2
32700	305.5	213.7	281.8	332.4	393.1
32750	307.7	215.3	283.9	334.8	395.9
32800	309.9	216.7	286	337.1	398.7
32850	312.1	218.1	288.1	339.4	401.5
32900	314.2	219.4	290.1	341.7	404.4
32950	316.1	220.4	291.9	343.8	406.9
33000	317.9	221.3	293.5	345.7	409.2
33050	319.6	222.2	295.2	347.6	411.6
33100	321.4	223	296.8	349.5	414
33150	322.8	223.6	298	351	415.9
33200	324.2	224.1	299.3	352.6	417.9
33250	325.6	224.6	300.5	354.2	419.9
33300	326.9	225.1	301.7	355.7	421.9
33350	328	225.4	302.6	357	423.7
33400	329.1	225.7	303.5	358.4	425.5
33450	330.2	226.1	304.5	359.8	427.3
33500	331.2	226.3	305.2	361	428.9
33550	332	226.4	305.8	362.1	430.5
33600	332.8	226.6	306.4	363.2	432
33650	333.5	226.7	307	364.3	433.5
33700	334	226.7	307.2	365.1	434.8
33750	334.4	226.5	307.4	365.8	435.9
33800	334.8	226.4	307.6	366.5	437.1
33850	335.1	226.3	307.7	367.2	438.1
33900	335	225.7	307.4	367.3	438.6
33950	334.8	225.2	307	367.4	439
34000	334.6	224.7	306.7	367.5	439.4
34050	334.2	224	306.1	367.3	439.5
34100	333.4	222.9	305.1	366.6	439
34150	332.5	221.9	304.1	365.9	438.5
34200	331.7	220.8	303.1	365.2	438
34250	330.6	219.5	301.9	364.1	437.1
34300	329.3	218	300.4	362.9	436
34350	328	216.6	299	361.6	434.8
34400	326.7	215.1	297.6	360.4	433.7
34450	325.2	213.3	295.9	358.9	432.3
34500	323.6	211.6	294.3	357.3	431
34550	322.1	209.8	292.6	355.8	429.6
34600	320.5	208	291	354.3	428.2
34650	318.9	206.1	289.2	352.6	426.7
34700	317.2	204.2	287.5	351	425.2
34750	315.6	202.3	285.7	349.3	423.7
34800	313.9	200.4	284	347.7	422.2
34850	312.2	198.5	282.2	346	420.7
34900	310.5	196.6	280.5	344.3	419.2
34950	308.8	194.7	278.7	342.6	417.7
35000	307.1	192.8	276.9	340.8	416.2
35050	305.3	190.9	275	339	414.6
35100	303.6	189	273.2	337.3	413
35150	301.8	187.1	271.3	335.5	411.4
35200	299.8	185.2	269.3	333.5	409.6
35250	297.9	183.3	267.3	331.6	407.8
35300	295.9	181.4	265.3	329.6	406
35350	293.8	179.4	263.2	327.5	404.1
35400	291.4	177.2	260.7	325.1	401.8
35450	289	175.1	258.3	322.7	399.5
35500	286.6	172.9	255.9	320.3	397.3
35550	283.8	170.5	253.1	317.4	394.6
35600	280.7	167.9	250.1	314.3	391.7
35650	277.6	165.2	247.1	311.2	388.8
35700	274.5	162.6	244.1	308	385.8
35750	270.8	159.6	240.5	304.4	382.4
35800	267.1	156.4	236.9	300.6	378.8
35850	263.4	153.2	233.2	296.8	375.2
35900	259.6	150	229.5	293	371.6
35950	255.3	146.3	225.4	288.7	367.5
36000	251.1	142.6	221.3	284.4	363.4
36050	246.9	138.9	217.1	280.2	359.3
36100	242.6	135.1	212.9	275.8	355.1
36150	238.1	131	208.5	271.4	350.8
36200	233.7	126.9	204.1	267	346.5
36250	229.3	122.9	199.7	262.6	342.2
36300	225	118.8	195.4	258.3	338
36350	220.7	114.7	191.2	254	333.9
36400	216.5	110.6	186.9	249.8	329.8
36450	212.2	106.5	182.7	245.6	325.7
36500	208.5	102.8	178.9	241.9	322.1
36550	204.9	99.1	175.2	238.3	318.6
36600	201.2	95.4	171.6	234.7	315.1
36650	197.7	92	168.1	231.3	311.8
36700	195	89.2	165.3	228.6	309.2
36750	192.3	86.4	162.6	225.9	306.6
36800	189.6	83.7	159.9	223.2	303.9
36850	187.3	81.4	157.6	221	301.8
36900	185.6	79.5	155.8	219.3	300.1
36950	183.8	77.7	154.1	217.5	298.4
37000	182.1	75.9	152.3	215.8	296.7
37050	181	74.7	151.2	214.7	295.7
37100	180.1	73.7	150.3	213.8	294.8
37150	179.2	72.7	149.4	212.9	293.9
37200	178.3	71.7	148.6	212	293
37250	178	71.3	148.3	211.7	292.7
37300	177.8	70.9	148.1	211.4	292.4
37350	177.5	70.5	147.9	211.1	292.1
37400	177.4	70.3	147.8	210.9	291.9
37450	177.5	70.3	148	211	291.9
37500	177.7	70.3	148.2	211	292
37550	177.8	70.4	148.4	211.1	292
37600	178.2	70.6	148.8	211.4	292.3
37650	178.8	71	149.4	211.9	292.8
37700	179.3	71.5	150.1	212.4	293.2
37750	179.9	71.9	150.7	212.8	293.6
37800	180.8	72.7	151.7	213.7	294.4
37850	181.8	73.5	152.7	214.6	295.3
37900	182.8	74.3	153.8	215.5	296.1
37950	183.8	75.2	154.8	216.5	297.1
38000	185.1	76.3	156.2	217.8	298.4
38050	186.5	77.4	157.6	219.1	299.6
38100	187.8	78.6	158.9	220.4	300.9
38150	189.3	79.7	160.4	221.9	302.4
38200	190.9	81	161.9	223.6	304.1
38250	192.5	82.2	163.4	225.2	305.8
38300	194.1	83.5	164.9	226.9	307.4
38350	195.6	84.5	166.3	228.6	309.2
38400	197.2	85.6	167.7	230.3	311.1
38450	198.8	86.6	169.1	232.1	312.9
38500	200.3	87.6	170.5	233.8	314.8
38550	201.6	88.1	171.5	235.3	316.6
38600	202.9	88.5	172.5	236.9	318.5
38650	204.1	89	173.5	238.4	320.3
38700	205.4	89.3	174.5	239.9	322.2
38750	206.4	89.2	175.2	241.3	324.1
38800	207.4	89.1	175.9	242.6	326.1
38850	208.5	88.9	176.6	244	328
38900	209.5	88.6	177.2	245.4	330.1
38950	210.4	88.1	177.7	246.7	332.3
39000	211.4	87.5	178.3	248.1	334.5
39050	212.4	87	178.8	249.5	336.7
39100	213.4	86.4	179.4	250.9	339.2
39150	214.5	85.7	180	252.4	341.7
39200	215.6	85.1	180.7	254	344.2
39250	216.7	84.5	181.3	255.5	346.8
39300	218	84.2	182.3	257.3	349.8
39350	219.4	83.8	183.2	259.2	352.7
39400	220.8	83.5	184.2	261	355.7
39450	222.3	83.3	185.3	263	358.7
39500	224	83.4	186.7	265.2	362.1
39550	225.8	83.6	188.1	267.5	365.4
39600	227.5	83.7	189.5	269.7	368.8
39650	229.6	84.2	191.1	272.2	372.3
39700	231.7	84.9	193	274.8	376
39750	233.9	85.6	194.9	277.5	379.6
39800	236	86.3	196.7	280.1	383.3
39850	238.5	87.5	198.9	283	387.1
39900	241	88.8	201.2	285.9	390.8
39950	243.5	90.1	203.5	288.8	394.6
40000	246.1	91.6	205.8	291.8	398.3
40050	248.8	93.5	208.4	294.8	401.9
40100	251.5	95.4	211	297.8	405.5
40150	254.3	97.3	213.5	300.9	409.1
40200	257	99.3	216.1	303.8	412.5
40250	259.6	101.4	218.7	306.7	415.6
40300	262.2	103.6	221.2	309.5	418.7
40350	264.9	105.8	223.8	312.4	421.9
40400	267.2	107.9	226.2	314.9	424.5
40450	269.4	109.9	228.4	317.3	427
40500	271.7	112	230.6	319.7	429.4
40550	273.9	114.1	232.9	322.1	431.9
40600	275.6	115.8	234.6	324	433.6
40650	277.2	117.5	236.3	325.8	435.3
40700	278.9	119.3	238	327.6	437.1
40750	280.4	120.8	239.6	329.2	438.6
40800	281.4	122	240.6	330.3	439.7
40850	282.4	123.2	241.7	331.4	440.7
40900	283.4	124.4	242.7	332.5	441.7
40950	284	125.3	243.4	333.2	442.4
41000	284.4	125.9	243.8	333.6	442.8
41050	284.8	126.6	244.2	334	443.2
41100	285.1	127.3	244.6	334.3	443.6
41150	285	127.6	244.5	334.2	443.5
41200	284.8	127.8	244.3	333.9	443.3
41250	284.6	128	244.1	333.6	443.1
41300	284.4	128.2	243.8	333.2	442.8
41350	283.8	128.2	243.3	332.6	442.2
41400	283.3	128.2	242.8	331.9	441.6
41450	282.8	128.2	242.3	331.2	441
41500	282.2	128.2	241.7	330.5	440.3
41550	281.7	128.3	241.2	329.8	439.5
41600	281.1	128.3	240.7	329	438.7
41650	280.6	128.3	240.1	328.3	438
41700	280.2	128.5	239.8	327.7	437.2
41750	279.9	128.8	239.5	327.2	436.4
41800	279.6	129.2	239.2	326.7	435.6
41850	279.2	129.5	238.9	326.2	434.9
41900	279.4	130.3	239	326.1	434.3
41950	279.5	131.1	239.2	326.1	433.7
42000	279.7	131.9	239.4	326	433.2
42050	280	132.8	239.7	326.1	432.7
42100	280.7	134.2	240.5	326.6	432.4
42150	281.5	135.6	241.3	327.1	432.2
42200	282.2	137	242.1	327.7	432
42250	283.3	138.7	243.2	328.5	432
42300	284.7	140.7	244.7	329.6	432.3
42350	286.1	142.6	246.1	330.8	432.5
42400	287.5	144.6	247.6	331.9	432.8
42450	289.3	146.9	249.4	333.5	433.4
42500	291.2	149.3	251.4	335.2	434.2
42550	293.2	151.8	253.4	336.8	435
42600	295.1	154.2	255.5	338.6	435.7
42650	297.4	156.9	257.8	340.6	437
42700	299.7	159.5	260.2	342.7	438.2
42750	302	162.2	262.6	344.8	439.4
42800	304.3	164.8	265	346.9	440.7
42850	306.4	167.3	267.3	348.9	442
42900	308.6	169.8	269.6	350.9	443.3
42950	310.8	172.3	271.9	353	444.6
43000	312.7	174.4	273.9	354.7	445.6
43050	314.3	176.3	275.7	356.2	446.6
43100	315.9	178.2	277.5	357.7	447.5
43150	317.6	180.1	279.2	359.2	448.4
43200	318.7	181.5	280.5	360.3	449
43250	319.7	182.8	281.7	361.2	449.4
43300	320.7	184.1	282.9	362.1	449.9
43350	321.6	185.3	284	363	450.3
43400	322.1	186	284.6	363.3	450.3
43450	322.5	186.8	285.2	363.7	450.4
43500	322.9	187.5	285.7	364	450.4
43550	323.2	188	286.2	364.2	450.3
43600	323.1	188.3	286.3	364.1	450.1
43650	323.1	188.6	286.4	364	449.8
43700	323.1	188.8	286.6	363.9	449.6
43750	322.9	188.8	286.5	363.7	449.3
43800	322.7	188.7	286.4	363.4	449
43850	322.4	188.6	286.2	363	448.6
43900	322.1	188.4	286.1	362.7	448.3
43950	321.8	188.2	286	362.4	448.1
44000	321.6	188	285.8	362.1	447.9
44050	321.3	187.8	285.7	361.7	447.7
44100	321.1	187.6	285.6	361.5	447.5
44150	321.2	187.6	285.8	361.4	447.6
44200	321.2	187.6	285.9	361.4	447.6
44250	321.2	187.6	286.1	361.3	447.7
44300	321.5	187.8	286.5	361.5	448
44350	322.1	188.3	287.2	361.9	448.5
44400	322.6	188.8	287.9	362.3	449
44450	323.1	189.3	288.5	362.8	449.5
44500	324.2	190.4	289.7	363.7	450.4
44550	325.4	191.6	291	364.8	451.5
44600	326.6	192.9	292.3	365.8	452.5
44650	327.8	194.1	293.6	366.9	453.6
44700	329.5	196	295.5	368.6	455.1
44750	331.3	197.8	297.4	370.2	456.6
44800	333.1	199.6	299.2	371.9	458.2
44850	335	201.6	301.2	373.7	459.8
44900	337.2	203.9	303.4	375.7	461.7
44950	339.4	206.1	305.6	377.8	463.6
45000	341.6	208.4	307.9	379.9	465.5
45050	343.8	210.7	310.2	382.1	467.5
45100	346.2	213.1	312.5	384.3	469.5
45150	348.5	215.5	314.8	386.6	471.6
45200	350.9	217.9	317.1	388.9	473.6
45250	353.2	220.2	319.4	391.1	475.7
45300	355.4	222.6	321.6	393.4	477.7
45350	357.7	224.9	323.8	395.6	479.8
45400	360	227.1	326	397.8	481.8
45450	362.2	229.4	328.1	400	483.8
45500	364.3	231.6	330.1	402.2	485.8
45550	366.5	233.8	332.2	404.4	487.8
45600	368.7	236	334.3	406.6	489.8
45650	370.8	238.2	336.3	408.7	491.7
45700	372.9	240.4	338.3	410.8	493.7
45750	375	242.6	340.4	413	495.6
45800	377	244.7	342.3	415	497.4
45850	379	246.8	344.1	417	499.2
45900	381	248.8	346	418.9	500.9
45950	382.9	250.9	347.9	420.9	502.6
46000	384.7	252.8	349.6	422.6	504
46050	386.4	254.7	351.2	424.3	505.4
46100	388.1	256.6	352.9	426	506.8
46150	389.8	258.5	354.5	427.6	508.2
46200	391.3	260.2	356	429.1	509.3
46250	392.8	261.9	357.4	430.5	510.5
46300	394.4	263.6	358.9	432	511.6
46350	395.8	265.2	360.4	433.3	512.7
46400	397.2	266.8	361.7	434.6	513.8
46450	398.6	268.3	363.1	435.9	514.8
46500	399.9	269.9	364.5	437.2	515.8
46550	401.2	271.3	365.8	438.4	516.9
46600	402.5	272.8	367.2	439.7	518
46650	403.8	274.2	368.5	440.9	519.2
46700	405.1	275.6	369.9	442.1	520.3
46750	406.3	277	371.2	443.3	521.6
46800	407.5	278.4	372.5	444.5	522.9
46850	408.7	279.7	373.9	445.7	524.2
46900	409.9	281	375.1	446.9	525.6
46950	410.9	282	376.2	447.9	527
47000	411.8	283.1	377.3	449	528.4
47050	412.8	284.1	378.4	450.1	529.8
47100	413.6	284.8	379.2	450.9	531.2
47150	414.2	285.3	379.9	451.7	532.5
47200	414.8	285.7	380.5	452.5	533.9
47250	415.4	286.2	381.2	453.2	535.2
47300	415.6	286.2	381.4	453.7	536.5
47350	415.8	286.1	381.6	454.2	537.7
47400	416.1	286	381.7	454.7	539
47450	416.2	285.8	381.8	455.1	540.2
47500	416.2	285.3	381.6	455.4	541.4
47550	416.1	284.7	381.4	455.6	542.5
47600	416	284.2	381.1	455.9	543.7
47650	415.9	283.5	380.8	456.1	544.8
47700	415.7	282.7	380.4	456.3	545.9
47750	415.5	281.9	379.9	456.5	547
47800	415.3	281	379.5	456.6	548.1
47850	415.1	280.2	379.1	456.8	549.3
47900	414.9	279.4	378.6	457	550.4
47950	414.8	278.6	378.2	457.3	551.6
48000	414.6	277.7	377.7	457.5	552.8

## Sheet: ∆t CLIM3
GICC05_yrs_b2k	∆years_(Hulu_minus_GICC05)	0.05	0.32	0.68	0.95
10750	-43.3	-57.4	-47.2	-39.2	-28.2
10800	-42.9	-56.9	-46.7	-38.8	-27.9
10850	-42.5	-56.4	-46.3	-38.4	-27.6
10900	-42	-55.9	-45.8	-37.9	-27.3
10950	-41.6	-55.4	-45.3	-37.5	-27
11000	-41.1	-54.9	-44.8	-37	-26.5
11050	-40.5	-54.3	-44.3	-36.5	-26.1
11100	-40	-53.8	-43.7	-35.9	-25.7
11150	-39.4	-53.1	-43.1	-35.3	-25.1
11200	-38.7	-52.4	-42.4	-34.6	-24.4
11250	-38	-51.8	-41.7	-33.9	-23.7
11300	-37.3	-51.1	-41	-33.1	-23
11350	-36.3	-50.2	-40	-32.2	-22
11400	-35.3	-49.3	-39.1	-31.1	-21
11450	-34.3	-48.4	-38.1	-30.1	-19.9
11500	-33.3	-47.5	-37.1	-29	-18.8
11550	-32	-46.4	-35.9	-27.7	-17.3
11600	-30.7	-45.3	-34.6	-26.3	-15.8
11650	-29.4	-44.2	-33.3	-24.9	-14.3
11700	-28.1	-43.1	-32.1	-23.5	-12.7
11750	-26.7	-42	-30.7	-22	-11
11800	-25.3	-40.9	-29.4	-20.5	-9.3
11850	-23.9	-39.8	-28.1	-19	-7.6
11900	-22.5	-38.8	-26.9	-17.5	-5.9
11950	-21.3	-37.9	-25.7	-16.1	-4.2
12000	-20	-37	-24.6	-14.7	-2.5
12050	-18.8	-36.1	-23.4	-13.3	-0.8
12100	-17.8	-35.4	-22.5	-12.2	0.6
12150	-16.8	-34.7	-21.6	-11.1	2
12200	-15.8	-34	-20.7	-9.9	3.4
12250	-14.8	-33.3	-19.8	-8.9	4.7
12300	-14.1	-32.8	-19.2	-8.1	5.6
12350	-13.4	-32.2	-18.5	-7.3	6.5
12400	-12.7	-31.7	-17.9	-6.6	7.4
12450	-12.1	-31.1	-17.3	-5.9	8.2
12500	-11.5	-30.6	-16.8	-5.3	8.7
12550	-11	-30	-16.2	-4.7	9.3
12600	-10.4	-29.4	-15.7	-4.1	9.9
12650	-9.9	-28.9	-15.1	-3.6	10.4
12700	-9.3	-28.3	-14.6	-3	10.9
12750	-8.8	-27.7	-14.1	-2.5	11.4
12800	-8.3	-27.1	-13.5	-2	11.9
12850	-7.9	-26.9	-13.2	-1.5	12.3
12900	-7.5	-26.7	-12.9	-1.1	12.8
12950	-7.2	-26.5	-12.6	-0.7	13.3
13000	-6.9	-26.5	-12.5	-0.3	13.8
13050	-6.9	-27.2	-12.6	-0.2	14.3
13100	-6.9	-27.8	-12.8	0	14.8
13150	-6.9	-28.4	-13	0.1	15.2
13200	-7.2	-29.5	-13.5	0.1	15.7
13250	-7.6	-30.9	-14.2	-0.1	16
13300	-8.1	-32.2	-14.9	-0.3	16.3
13350	-8.5	-33.6	-15.6	-0.5	16.7
13400	-9.4	-35.5	-16.7	-1.1	16.8
13450	-10.3	-37.6	-17.9	-1.7	16.8
13500	-11.2	-39.6	-19.1	-2.4	16.8
13550	-12.1	-41.6	-20.3	-3.1	16.8
13600	-13.4	-44	-21.9	-4.1	16.5
13650	-14.8	-46.4	-23.5	-5.2	16.3
13700	-16.1	-48.8	-25.1	-6.2	16
13750	-17.5	-51.3	-26.8	-7.4	15.5
13800	-19.1	-53.9	-28.7	-8.8	15
13850	-20.8	-56.5	-30.5	-10.2	14.4
13900	-22.4	-59	-32.4	-11.6	13.8
13950	-24.1	-61.6	-34.3	-13	13.2
14000	-25.8	-64.1	-36.2	-14.5	12.5
14050	-27.5	-66.6	-38.1	-16	11.9
14100	-29.2	-69.2	-40	-17.5	11.2
14150	-30.7	-71.4	-41.7	-18.8	10.7
14200	-32.2	-73.6	-43.3	-20	10.3
14250	-33.7	-75.8	-45	-21.3	9.8
14300	-35	-77.9	-46.5	-22.4	9.5
14350	-35.8	-79.4	-47.4	-22.9	9.6
14400	-36.6	-80.9	-48.4	-23.5	9.8
14450	-37.4	-82.4	-49.4	-24.1	9.9
14500	-37.7	-83.3	-49.8	-24	10.6
14550	-37.3	-83.7	-49.6	-23.4	11.7
14600	-37	-84.1	-49.5	-22.9	12.9
14650	-36.7	-84.5	-49.3	-22.3	14.1
14700	-35.4	-84.1	-48.3	-20.7	16.2
14750	-33.8	-83.3	-46.9	-18.9	18.5
14800	-32.3	-82.6	-45.6	-17.1	20.8
14850	-30.6	-81.8	-44.2	-15.2	23.2
14900	-27.9	-80	-41.7	-12.2	26.7
14950	-25.2	-78.2	-39.2	-9.2	30.3
15000	-22.5	-76.4	-36.8	-6.2	33.8
15050	-19.5	-74.3	-34	-2.9	37.6
15100	-15.9	-71.8	-30.7	1	42.2
15150	-12.3	-69.2	-27.4	5	46.7
15200	-8.7	-66.6	-24.1	8.9	51.2
15250	-4.8	-63.8	-20.6	13.2	56.2
15300	-0.7	-60.9	-16.8	17.7	61.4
15350	3.4	-57.9	-13	22.2	66.6
15400	7.5	-54.9	-9.3	26.8	71.9
15450	11.8	-52	-5.4	31.5	77.5
15500	16.1	-49.1	-1.5	36.3	83.1
15550	20.4	-46.2	2.3	41.1	88.7
15600	24.6	-43.4	6.2	45.9	94.4
15650	28.8	-41	9.8	50.7	100.1
15700	33	-38.6	13.5	55.4	105.8
15750	37.2	-36.2	17.1	60.2	111.5
15800	41.2	-34.1	20.6	64.8	117.2
15850	45.1	-32.3	23.9	69.4	122.8
15900	49	-30.5	27.2	73.9	128.4
15950	52.8	-28.8	30.5	78.5	134
16000	56.4	-27.4	33.4	82.8	139.5
16050	59.8	-26.3	36.3	87	144.8
16100	63.3	-25.2	39.1	91.2	150.2
16150	66.7	-24.1	41.9	95.4	155.5
16200	69.8	-23.4	44.3	99.2	160.5
16250	72.8	-22.7	46.8	102.9	165.5
16300	75.8	-22	49.2	106.7	170.5
16350	78.7	-21.3	51.5	110.3	175.3
16400	81.3	-20.7	53.7	113.5	179.9
16450	84	-20.2	55.9	116.8	184.4
16500	86.6	-19.6	58	120.1	188.9
16550	89.2	-18.9	60.2	123.2	193.3
16600	91.6	-18.2	62.3	126.2	197.7
16650	94.1	-17.4	64.5	129.2	202
16700	96.6	-16.7	66.6	132.2	206.3
16750	99.2	-15.5	68.9	135.1	210.6
16800	101.7	-14.3	71.3	138.1	214.9
16850	104.3	-13	73.7	141	219.2
16900	107	-11.7	76.1	144	223.5
16950	109.9	-9.7	79	147.2	228
17000	112.9	-7.7	81.9	150.3	232.4
17050	115.8	-5.7	84.8	153.5	236.9
17100	119	-3.4	87.8	156.8	241.4
17150	122.5	-0.5	91.3	160.4	246
17200	126	2.3	94.8	164	250.6
17250	129.5	5.1	98.3	167.6	255.3
17300	133.2	8.4	102	171.3	259.9
17350	137.1	11.8	105.9	175.2	264.5
17400	141	15.2	109.8	179	269.1
17450	144.9	18.7	113.7	182.9	273.7
17500	149	22.4	117.8	186.8	278.1
17550	153.1	26.1	121.9	190.8	282.5
17600	157.2	29.8	125.9	194.7	286.9
17650	161.3	33.6	130	198.7	291.3
17700	165.4	37.4	134.1	202.7	295.4
17750	169.5	41.2	138.1	206.6	299.6
17800	173.6	45	142.2	210.6	303.7
17850	177.7	48.8	146.2	214.5	307.7
17900	181.8	52.6	150.2	218.5	311.6
17950	185.9	56.4	154.2	222.4	315.5
18000	190	60.2	158.2	226.3	319.4
18050	194	64.1	162.2	230.3	323.2
18100	198.1	67.9	166.2	234.3	327
18150	202.2	71.8	170.1	238.3	330.8
18200	206.2	75.7	174.1	242.2	334.6
18250	210.4	79.7	178.2	246.4	338.4
18300	214.5	83.7	182.2	250.5	342.2
18350	218.7	87.8	186.3	254.6	346
18400	222.8	91.9	190.4	258.8	349.8
18450	227.1	96.2	194.6	263.1	353.7
18500	231.4	100.5	198.8	267.4	357.6
18550	235.6	104.8	203	271.7	361.4
18600	240	109.2	207.3	276.1	365.4
18650	244.4	113.8	211.7	280.6	369.3
18700	248.8	118.4	216.1	285.1	373.2
18750	253.3	123	220.6	289.5	377.2
18800	257.7	127.7	225.1	294	381.1
18850	262.2	132.5	229.6	298.5	385
18900	266.6	137.2	234.1	303	388.9
18950	271.1	142	238.6	307.5	392.8
19000	275.5	146.7	243.1	311.9	396.6
19050	279.8	151.3	247.5	316.3	400.3
19100	284.2	156	252	320.6	404.1
19150	288.5	160.6	256.4	324.9	407.9
19200	292.6	165.1	260.6	329.1	411.5
19250	296.8	169.6	264.9	333.2	415.1
19300	300.9	174	269.1	337.4	418.7
19350	304.8	178.2	273.1	341.3	422.2
19400	308.6	182.2	277	345.1	425.6
19450	312.4	186.3	280.8	348.9	429
19500	316.2	190.3	284.7	352.7	432.4
19550	319.5	193.8	288	356	435.4
19600	322.7	197.2	291.3	359.2	438.4
19650	325.9	200.6	294.6	362.5	441.4
19700	329	203.8	297.7	365.6	444.2
19750	331.6	206.5	300.2	368.2	446.6
19800	334.1	209.1	302.8	370.8	448.9
19850	336.7	211.7	305.3	373.4	451.3
19900	338.9	214.1	307.5	375.7	453.4
19950	340.9	216	309.4	377.7	455.2
20000	342.8	218	311.2	379.7	457
20050	344.7	219.9	313.1	381.7	458.9
20100	346.2	221.4	314.5	383.2	460.3
20150	347.6	222.8	315.8	384.6	461.6
20200	349	224.2	317.1	385.9	463
20250	350.3	225.6	318.3	387.3	464.3
20300	351.1	226.4	319	388	465
20350	351.8	227.2	319.6	388.7	465.7
20400	352.6	228	320.3	389.5	466.5
20450	353.1	228.6	320.8	390	467
20500	353.2	228.9	320.7	390	466.9
20550	353.2	229.1	320.7	389.9	466.8
20600	353.3	229.3	320.7	389.9	466.8
20650	352.9	229.2	320.2	389.4	466.2
20700	352.2	228.8	319.5	388.6	465.3
20750	351.5	228.4	318.7	387.8	464.4
20800	350.8	228	318	387	463.5
20850	349.4	227.1	316.7	385.4	461.8
20900	347.9	226.1	315.2	383.8	459.9
20950	346.5	225.1	313.8	382.1	458.1
21000	344.9	224	312.3	380.4	456.2
21050	342.9	222.5	310.4	378.2	453.8
21100	340.9	221	308.5	376	451.3
21150	338.9	219.6	306.6	373.7	448.8
21200	336.8	218	304.6	371.4	446.3
21250	334.5	216.3	302.4	368.8	443.5
21300	332.3	214.6	300.3	366.3	440.7
21350	330	212.9	298.2	363.8	438
21400	327.8	211.2	296.1	361.3	435.2
21450	325.6	209.6	294.1	358.8	432.5
21500	323.4	207.9	292.1	356.3	429.7
21550	321.2	206.3	290	353.8	427
21600	319.3	205	288.4	351.7	424.5
21650	317.5	203.7	286.7	349.6	422.1
21700	315.7	202.4	285.1	347.5	419.7
21750	313.9	201.2	283.5	345.5	417.4
21800	312.6	200.3	282.4	344	415.5
21850	311.2	199.5	281.2	342.4	413.7
21900	309.9	198.6	280	340.8	411.8
21950	308.7	198	279.1	339.6	410.3
22000	307.9	197.6	278.4	338.6	409.2
22050	307	197.2	277.8	337.6	408.1
22100	306.2	196.8	277.1	336.7	406.9
22150	305.7	196.7	276.8	336.1	406.3
22200	305.2	196.6	276.5	335.6	405.8
22250	304.8	196.6	276.2	335.1	405.3
22300	304.3	196.5	276	334.6	404.8
22350	304.1	196.7	275.9	334.4	404.7
22400	303.9	196.8	275.9	334.2	404.6
22450	303.7	196.9	275.8	334	404.6
22500	303.5	197	275.7	333.8	404.5
22550	303.2	197.2	275.6	333.5	404.3
22600	302.9	197.3	275.5	333.2	404.2
22650	302.6	197.4	275.4	333	404.1
22700	302.1	197.4	275	332.4	403.8
22750	301.5	197.4	274.6	331.8	403.2
22800	300.8	197.3	274.2	331.1	402.7
22850	300.2	197.2	273.7	330.4	402.2
22900	299.3	197	273	329.4	401.3
22950	298.4	196.7	272.3	328.5	400.4
23000	297.5	196.5	271.6	327.5	399.5
23050	296.6	196.2	270.9	326.5	398.6
23100	295.6	195.7	270	325.4	397.4
23150	294.6	195.2	269.2	324.3	396.3
23200	293.6	194.7	268.3	323.2	395.1
23250	292.6	194.1	267.4	322.1	393.9
23300	291.7	193.4	266.4	321.1	392.7
23350	290.7	192.6	265.5	320.1	391.4
23400	289.7	191.9	264.5	319	390.2
23450	288.8	190.9	263.5	318	388.9
23500	287.8	189.8	262.4	317.1	387.7
23550	286.9	188.7	261.3	316.2	386.5
23600	286	187.6	260.2	315.3	385.3
23650	285	186.1	259	314.5	384.2
23700	284	184.6	257.7	313.6	383.1
23750	283.1	183.2	256.5	312.8	382
23800	282	181.6	255.2	311.9	380.9
23850	280.9	179.8	253.7	311	379.9
23900	279.7	178	252.2	310.1	378.9
23950	278.6	176.2	250.7	309.3	377.9
24000	277.4	174.4	249.1	308.4	377
24050	276.1	172.4	247.5	307.5	376.1
24100	274.9	170.5	245.9	306.6	375.3
24150	273.6	168.5	244.3	305.7	374.4
24200	272.3	166.5	242.7	304.8	373.6
24250	270.9	164.5	241	303.8	372.7
24300	269.6	162.5	239.4	302.9	371.9
24350	268.2	160.5	237.7	301.9	371
24400	266.4	158.2	235.7	300.4	369.8
24450	264.6	155.9	233.7	299	368.6
24500	262.8	153.6	231.7	297.6	367.4
24550	260.7	151.1	229.5	295.8	366
24600	258.1	148.3	226.9	293.5	364
24650	255.5	145.4	224.3	291.2	362
24700	252.9	142.5	221.6	288.9	360
24750	249.9	139.4	218.6	286.1	357.5
24800	246.5	136	215.2	282.8	354.7
24850	243.1	132.6	211.9	279.6	351.9
24900	239.7	129.2	208.6	276.4	349.1
24950	235.8	125.5	204.8	272.5	345.7
25000	231.8	121.8	201	268.6	342.2
25050	227.8	118	197.1	264.6	338.7
25100	223.7	114.3	193.2	260.6	335.2
25150	219.5	110.6	189.2	256.3	331.4
25200	215.2	106.9	185.1	252	327.6
25250	211	103.2	181	247.8	323.9
25300	206.9	99.7	177.1	243.6	320.1
25350	202.9	96.4	173.2	239.5	316.5
25400	198.9	93.2	169.4	235.4	312.9
25450	194.9	89.9	165.6	231.3	309.2
25500	191.3	87.1	162.1	227.5	305.8
25550	187.8	84.5	158.7	223.9	302.5
25600	184.3	81.8	155.4	220.3	299.2
25650	180.8	79.2	152.1	216.7	295.9
25700	178.1	77.3	149.5	213.7	293.1
25750	175.4	75.4	147	210.8	290.3
25800	172.7	73.6	144.4	207.9	287.5
25850	170.2	71.9	142.1	205.2	284.8
25900	168.4	70.9	140.5	203.1	282.6
25950	166.6	70	138.9	201.1	280.4
26000	164.9	69	137.2	199	278.1
26050	163.6	68.5	136.2	197.5	276.3
26100	162.9	68.4	135.6	196.4	274.8
26150	162.1	68.4	135.1	195.3	273.2
26200	161.4	68.3	134.5	194.2	271.7
26250	161.3	68.9	134.6	193.8	270.7
26300	161.4	69.7	134.9	193.5	269.8
26350	161.5	70.4	135.2	193.2	268.9
26400	161.7	71.2	135.6	193	268
26450	162.3	72.4	136.5	193.3	267.6
26500	163	73.7	137.3	193.6	267.1
26550	163.7	75	138.2	193.9	266.7
26600	164.4	76.4	139.2	194.2	266.4
26650	165.3	77.9	140.4	194.8	266.2
26700	166.2	79.4	141.5	195.3	266
26750	167.1	80.9	142.6	195.8	265.8
26800	168	82.4	143.7	196.4	265.6
26850	168.9	83.9	144.9	196.9	265.4
26900	169.8	85.4	146	197.5	265.3
26950	170.7	86.9	147.1	198	265.1
27000	171.7	88.5	148.3	198.8	265.2
27050	172.7	90.2	149.6	199.5	265.3
27100	173.8	91.9	150.8	200.2	265.3
27150	174.9	93.6	152.2	201.1	265.5
27200	176.5	95.7	153.9	202.4	266.1
27250	178	97.9	155.7	203.6	266.7
27300	179.5	100	157.4	204.9	267.3
27350	181.5	102.6	159.6	206.7	268.4
27400	184.1	105.7	162.3	209	270.1
27450	186.6	108.7	165	211.3	271.8
27500	189.2	111.8	167.8	213.6	273.4
27550	192.7	115.9	171.5	216.9	276.2
27600	196.7	120.3	175.6	220.7	279.3
27650	200.6	124.7	179.7	224.4	282.4
27700	204.6	129.1	183.8	228.2	285.6
27750	209.8	134.7	189	233.2	289.9
27800	214.9	140.2	194.3	238.2	294.3
27850	220.1	145.7	199.6	243.1	298.7
27900	225.5	151.4	205	248.4	303.3
27950	231.4	157.6	211	254.1	308.5
28000	237.4	163.7	217	259.9	313.7
28050	243.3	169.9	223	265.7	318.8
28100	249.2	175.9	228.9	271.4	324
28150	255	181.8	234.8	277.1	329.2
28200	260.9	187.8	240.7	282.9	334.4
28250	266.8	193.7	246.6	288.6	339.6
28300	271.9	198.8	251.8	293.6	344.2
28350	276.9	203.6	256.8	298.5	348.7
28400	281.9	208.5	261.8	303.4	353.1
28450	286.7	213.2	266.7	308.2	357.5
28500	290.6	216.8	270.6	312.1	361.1
28550	294.5	220.4	274.5	315.9	364.8
28600	298.4	224	278.4	319.8	368.4
28650	301.7	227	281.7	323.2	371.7
28700	304.4	229.1	284.3	325.9	374.4
28750	307	231.2	286.9	328.5	377.2
28800	309.6	233.4	289.5	331.2	380
28850	311.3	234.5	291.1	333.1	382
28900	312.5	235.2	292.2	334.4	383.7
28950	313.8	235.8	293.4	335.8	385.4
29000	315	236.5	294.5	337.2	387.1
29050	314.9	235.7	294.2	337.3	387.7
29100	314.6	234.9	293.8	337.3	388.2
29150	314.4	234	293.5	337.3	388.8
29200	313.9	232.9	292.8	337	389.1
29250	312.5	230.9	291.2	335.9	388.6
29300	311	228.9	289.6	334.7	388.1
29350	309.6	226.8	287.9	333.5	387.6
29400	307.7	224.4	285.8	331.9	386.7
29450	305.3	221.5	283.3	329.9	385.5
29500	303	218.5	280.8	327.9	384.2
29550	300.7	215.6	278.2	325.8	382.9
29600	298	212.4	275.3	323.4	381.4
29650	295.1	209	272.3	320.9	379.7
29700	292.3	205.6	269.3	318.4	378
29750	289.5	202.3	266.2	315.9	376.3
29800	287	199.2	263.5	313.6	374.8
29850	284.4	196.1	260.7	311.3	373.3
29900	281.9	192.9	257.9	309	371.8
29950	279.6	190.2	255.5	307	370.5
30000	278	188	253.7	305.6	369.9
30050	276.4	185.9	252	304.2	369.2
30100	274.8	183.7	250.2	302.8	368.5
30150	274	182.3	249.2	302.2	368.5
30200	273.7	181.5	248.8	302	368.9
30250	273.4	180.7	248.3	301.9	369.4
30300	273.1	179.8	247.8	301.7	369.8
30350	273.9	180.2	248.6	302.7	371.3
30400	274.9	180.8	249.5	303.9	372.9
30450	276	181.3	250.4	305	374.5
30500	277.1	182	251.4	306.3	376.2
30550	278.8	183.3	253	308.1	378.2
30600	280.6	184.7	254.7	309.9	380.3
30650	282.3	186.1	256.3	311.8	382.4
30700	284	187.5	257.9	313.6	384.3
30750	285.7	188.9	259.5	315.3	386
30800	287.4	190.3	261.2	317	387.7
30850	289	191.8	262.8	318.8	389.4
30900	290.2	192.8	263.9	319.9	390.5
30950	291.1	193.6	264.8	320.9	391.2
31000	292.1	194.5	265.7	321.8	391.9
31050	293	195.3	266.6	322.7	392.6
31100	292.7	195.1	266.3	322.3	392
31150	292.4	194.8	266	321.9	391.4
31200	292.1	194.5	265.7	321.6	390.8
31250	291.6	194.1	265.2	320.9	389.9
31300	290.4	193	264	319.6	388.3
31350	289.1	191.9	262.9	318.3	386.8
31400	287.9	190.8	261.7	317	385.2
31450	286.5	189.5	260.4	315.5	383.4
31500	284.9	188.1	258.9	313.8	381.6
31550	283.4	186.6	257.4	312.1	379.7
31600	281.8	185.1	255.9	310.5	377.8
31650	280.5	183.9	254.6	309.1	376.3
31700	279.2	182.6	253.4	307.8	374.9
31750	277.9	181.4	252.1	306.5	373.5
31800	276.7	180.2	251	305.2	372.2
31850	276.3	179.7	250.6	304.9	371.9
31900	275.9	179.2	250.2	304.6	371.6
31950	275.5	178.7	249.8	304.3	371.4
32000	275.5	178.6	249.8	304.3	371.6
32050	276.2	178.9	250.4	305.2	372.6
32100	276.8	179.3	251	306	373.5
32150	277.5	179.7	251.6	306.8	374.5
32200	278.9	180.6	252.8	308.3	376.3
32250	280.6	181.8	254.4	310.3	378.5
32300	282.4	183	256	312.2	380.7
32350	284.1	184.2	257.7	314.2	382.9
32400	286.7	186	260.1	316.9	386
32450	289.4	187.9	262.6	319.8	389.2
32500	292	189.7	265	322.7	392.3
32550	294.8	191.7	267.6	325.6	395.6
32600	298	193.9	270.7	329.1	399.3
32650	301.3	196.2	273.8	332.5	402.9
32700	304.5	198.4	276.8	335.9	406.6
32750	307.7	200.6	279.9	339.3	410.2
32800	310.8	202.8	282.9	342.5	413.6
32850	314	204.9	285.8	345.8	417
32900	317.1	207	288.8	349	420.4
32950	319.7	208.7	291.3	351.6	423.1
33000	322	210.3	293.6	354	425.4
33050	324.4	211.9	295.8	356.4	427.8
33100	326.8	213.4	298.1	358.9	430.2
33150	328.3	214.5	299.7	360.4	431.7
33200	329.9	215.6	301.2	362	433.1
33250	331.5	216.7	302.8	363.6	434.6
33300	332.9	217.7	304.2	364.9	435.9
33350	333.9	218.5	305.1	365.8	436.7
33400	334.8	219.3	306.1	366.7	437.6
33450	335.8	220.1	307	367.6	438.4
33500	336.4	220.8	307.7	368.3	439
33550	336.9	221.3	308.2	368.7	439.5
33600	337.3	221.9	308.6	369.1	440
33650	337.8	222.5	309.1	369.5	440.5
33700	337.9	222.8	309.1	369.7	440.8
33750	337.9	223	309.1	369.7	441.1
33800	338	223.3	309.1	369.8	441.4
33850	338	223.5	309.1	369.8	441.6
33900	337.4	223	308.4	369.3	441.6
33950	336.9	222.5	307.7	368.8	441.5
34000	336.3	222	307.1	368.4	441.5
34050	335.5	221.1	306.1	367.7	441.2
34100	334.2	219.6	304.6	366.5	440.6
34150	332.8	218	303.1	365.4	440
34200	331.5	216.5	301.6	364.3	439.4
34250	329.9	214.4	299.7	362.9	438.4
34300	328	212	297.6	361.3	437.4
34350	326.2	209.7	295.6	359.8	436.3
34400	324.4	207.3	293.5	358.2	435.2
34450	322.4	204.7	291.3	356.5	433.9
34500	320.4	202	289.1	354.8	432.6
34550	318.4	199.3	286.9	353.1	431.2
34600	316.4	196.6	284.7	351.4	429.9
34650	314.4	194	282.5	349.8	428.5
34700	312.5	191.3	280.4	348.1	427.1
34750	310.6	188.7	278.3	346.5	425.8
34800	308.8	186.2	276.3	344.9	424.5
34850	307.1	184	274.5	343.5	423.2
34900	305.5	181.7	272.7	342.1	422
34950	303.8	179.5	270.9	340.7	420.8
35000	302.4	177.6	269.4	339.4	419.7
35050	301	175.8	267.9	338.2	418.7
35100	299.6	174	266.4	337	417.7
35150	298.2	172.2	264.9	335.9	416.7
35200	296.9	170.8	263.5	334.7	415.9
35250	295.7	169.3	262.2	333.6	415.1
35300	294.4	167.9	260.9	332.5	414.3
35350	293.1	166.5	259.5	331.3	413.4
35400	291.5	165	257.9	329.8	412.5
35450	290	163.6	256.4	328.4	411.5
35500	288.4	162.1	254.8	326.9	410.5
35550	286.5	160.5	252.8	325.1	409.1
35600	284.2	158.6	250.6	322.9	407.6
35650	282	156.7	248.4	320.8	406
35700	279.8	154.9	246.2	318.6	404.5
35750	276.9	152.5	243.3	315.8	402.3
35800	274	150	240.4	312.9	400
35850	271	147.5	237.4	310	397.7
35900	268	145	234.4	307	395.3
35950	264.4	141.9	230.8	303.5	392.3
36000	260.8	138.7	227.3	300	389.3
36050	257.3	135.6	223.8	296.4	386.3
36100	253.7	132.4	220.3	292.9	383.2
36150	250.2	129.2	216.8	289.4	379.9
36200	246.7	126	213.3	285.9	376.7
36250	243.2	122.8	209.8	282.4	373.5
36300	240.2	119.9	206.8	279.3	370.5
36350	237.3	117.2	204.1	276.4	367.6
36400	234.5	114.5	201.3	273.6	364.7
36450	231.7	111.8	198.5	270.7	361.8
36500	229.7	109.8	196.6	268.7	359.6
36550	227.7	107.9	194.7	266.7	357.4
36600	225.8	106	192.9	264.7	355.2
36650	224	104.3	191.2	262.8	353.1
36700	222.9	103.2	190.2	261.7	351.7
36750	221.9	102.2	189.3	260.6	350.3
36800	220.8	101.2	188.3	259.4	348.9
36850	220	100.4	187.6	258.6	347.8
36900	219.6	100	187.3	258.1	347.1
36950	219.1	99.7	186.9	257.6	346.3
37000	218.7	99.3	186.6	257.1	345.5
37050	218.5	99.1	186.5	256.9	345
37100	218.4	99	186.4	256.7	344.6
37150	218.3	99	186.4	256.6	344.1
37200	218.2	98.9	186.4	256.5	343.7
37250	218.2	98.9	186.4	256.5	343.5
37300	218.2	98.9	186.5	256.6	343.2
37350	218.3	98.9	186.5	256.6	342.9
37400	218.3	98.8	186.5	256.6	342.7
37450	218.3	98.7	186.5	256.7	342.6
37500	218.3	98.5	186.5	256.7	342.4
37550	218.3	98.3	186.5	256.8	342.2
37600	218.4	98.2	186.5	256.9	342.2
37650	218.4	97.9	186.4	257	342.2
37700	218.5	97.7	186.4	257.2	342.2
37750	218.6	97.5	186.4	257.3	342.3
37800	218.8	97.3	186.5	257.6	342.6
37850	219.1	97.2	186.6	258	343
37900	219.3	97	186.8	258.3	343.4
37950	219.6	96.9	186.9	258.7	343.8
38000	220.2	97	187.3	259.4	344.6
38050	220.7	97.1	187.7	260	345.5
38100	221.3	97.2	188.1	260.7	346.3
38150	222	97.4	188.6	261.5	347.2
38200	222.9	97.9	189.3	262.6	348.4
38250	223.8	98.4	190	263.6	349.7
38300	224.7	98.9	190.7	264.6	350.9
38350	225.7	99.4	191.5	265.8	352.2
38400	226.7	100	192.4	266.9	353.6
38450	227.8	100.7	193.2	268.1	355
38500	228.8	101.3	194	269.3	356.3
38550	229.7	101.7	194.8	270.3	357.6
38600	230.6	102.1	195.5	271.4	358.9
38650	231.4	102.5	196.2	272.4	360.2
38700	232.3	102.8	196.9	273.4	361.5
38750	232.9	102.9	197.4	274.2	362.7
38800	233.6	102.9	197.9	275	364
38850	234.3	102.9	198.5	275.8	365.2
38900	234.9	102.7	198.9	276.6	366.5
38950	235.4	102.3	199.2	277.3	367.7
39000	236	101.9	199.6	278	369
39050	236.5	101.5	200	278.6	370.3
39100	237.3	101.1	200.5	279.5	371.9
39150	238.1	100.8	201.1	280.5	373.5
39200	238.9	100.5	201.8	281.5	375.1
39250	239.8	100.2	202.4	282.5	376.7
39300	241.4	100.5	203.7	284.1	378.9
39350	242.9	100.8	205	285.8	381.1
39400	244.5	101.1	206.3	287.5	383.2
39450	246.3	101.6	207.8	289.4	385.6
39500	248.6	102.6	209.8	291.7	388.4
39550	250.8	103.6	211.8	294.1	391.2
39600	253.1	104.6	213.7	296.4	393.9
39650	255.7	106.1	216	299.1	397
39700	258.5	107.7	218.6	302	400.3
39750	261.3	109.4	221.1	304.9	403.5
39800	264.1	111.1	223.6	307.8	406.8
39850	267.1	113.1	226.4	310.8	410.2
39900	270.1	115.2	229.2	313.9	413.7
39950	273.1	117.3	232	317	417.2
40000	276.1	119.5	234.8	320	420.6
40050	278.9	121.8	237.6	322.9	423.9
40100	281.7	124.1	240.5	325.8	427.2
40150	284.6	126.4	243.3	328.7	430.6
40200	287.2	128.8	246.1	331.4	433.7
40250	289.7	131.2	248.7	333.9	436.6
40300	292.2	133.6	251.3	336.4	439.4
40350	294.7	136.1	254	339	442.3
40400	296.8	138.5	256.3	341.1	444.7
40450	298.8	140.9	258.6	343.1	446.8
40500	300.8	143.3	260.8	345.1	449
40550	302.7	145.7	263.1	347.1	451.2
40600	304.2	147.8	264.8	348.5	452.7
40650	305.7	150	266.5	349.9	454.2
40700	307.1	152.1	268.3	351.4	455.7
40750	308.4	154.2	269.8	352.6	457
40800	309.4	155.8	271	353.5	457.9
40850	310.3	157.5	272.2	354.4	458.7
40900	311.2	159.2	273.4	355.2	459.6
40950	312	160.7	274.3	355.9	460.3
41000	312.7	162.1	275.2	356.5	460.9
41050	313.3	163.4	276	357.1	461.5
41100	313.9	164.7	276.8	357.6	462
41150	314.5	166	277.5	358.1	462.6
41200	315.1	167.2	278.2	358.6	463.1
41250	315.7	168.5	278.8	359.1	463.6
41300	316.2	169.7	279.5	359.7	464.1
41350	317	171.1	280.3	360.3	464.7
41400	317.7	172.5	281.1	361	465.3
41450	318.4	173.9	282	361.7	465.8
41500	319.3	175.5	282.9	362.4	466.4
41550	320.3	177.2	284	363.3	467
41600	321.3	179	285.1	364.2	467.6
41650	322.4	180.8	286.2	365.1	468.3
41700	323.5	182.8	287.5	366.1	468.8
41750	324.8	185	288.9	367.2	469.3
41800	326	187.2	290.3	368.2	469.9
41850	327.3	189.3	291.7	369.3	470.4
41900	328.6	191.7	293.3	370.3	470.7
41950	329.9	194.2	294.8	371.3	470.9
42000	331.3	196.6	296.4	372.3	471.2
42050	332.6	199	298	373.3	471.4
42100	333.8	201.4	299.5	374.2	471.4
42150	335.1	203.9	301	375	471.4
42200	336.3	206.3	302.6	375.9	471.3
42250	337.4	208.6	304	376.6	471.2
42300	338.4	210.8	305.3	377.2	470.8
42350	339.4	212.9	306.6	377.8	470.5
42400	340.4	215.1	307.9	378.4	470.2
42450	341.2	216.9	309	378.8	469.6
42500	341.8	218.7	310	379.1	468.9
42550	342.5	220.4	310.9	379.4	468.3
42600	343.2	222.1	311.9	379.7	467.6
42650	343.5	223.3	312.5	379.8	466.7
42700	343.8	224.5	313.1	379.8	465.7
42750	344.1	225.7	313.6	379.8	464.8
42800	344.4	226.7	314.1	379.8	463.8
42850	344.5	227.3	314.4	379.6	462.9
42900	344.5	228	314.6	379.5	461.9
42950	344.6	228.6	314.9	379.4	460.9
43000	344.6	229	315	379.2	460.1
43050	344.5	229.2	315	379.1	459.4
43100	344.4	229.4	315	378.9	458.6
43150	344.4	229.5	315	378.8	457.9
43200	344.3	229.4	314.9	378.7	457.5
43250	344.2	229.2	314.8	378.7	457.1
43300	344.1	229.1	314.7	378.7	456.7
43350	344	228.9	314.5	378.6	456.4
43400	344	228.5	314.4	378.8	456.4
43450	343.9	228.2	314.3	378.9	456.5
43500	343.9	227.9	314.1	379.1	456.5
43550	344	227.6	314.1	379.3	456.7
43600	344.1	227.4	314.1	379.7	457.2
43650	344.3	227.1	314.1	380	457.7
43700	344.5	226.9	314.1	380.4	458.1
43750	344.8	226.9	314.3	381	458.9
43800	345.3	227.1	314.6	381.6	459.7
43850	345.7	227.2	314.8	382.2	460.6
43900	346.2	227.3	315.1	382.8	461.4
43950	346.8	227.8	315.6	383.6	462.4
44000	347.5	228.2	316.1	384.3	463.3
44050	348.1	228.7	316.6	385.1	464.3
44100	348.8	229.2	317.1	385.8	465.2
44150	349.5	229.8	317.7	386.5	466.1
44200	350.2	230.5	318.4	387.2	466.9
44250	350.9	231.2	319	388	467.7
44300	351.7	231.9	319.7	388.6	468.4
44350	352.4	232.7	320.4	389.3	469
44400	353.1	233.5	321.1	389.9	469.7
44450	353.9	234.4	321.8	390.5	470.3
44500	354.5	235.2	322.5	391	470.8
44550	355.2	236	323.3	391.5	471.2
44600	355.9	236.9	324	392	471.7
44650	356.5	237.7	324.8	392.5	472.1
44700	357.1	238.5	325.5	392.8	472.4
44750	357.7	239.3	326.2	393.2	472.8
44800	358.3	240.1	326.9	393.6	473.1
44850	358.9	240.8	327.7	393.9	473.4
44900	359.4	241.5	328.3	394.2	473.6
44950	359.9	242.1	329	394.5	473.8
45000	360.4	242.7	329.6	394.8	474.1
45050	360.9	243.2	330.3	395.1	474.3
45100	361.4	243.7	331	395.5	474.6
45150	362	244.2	331.6	395.9	474.9
45200	362.5	244.7	332.3	396.3	475.2
45250	363.1	245.1	333	396.8	475.6
45300	363.8	245.5	333.8	397.3	476.1
45350	364.4	245.9	334.5	397.9	476.5
45400	365.1	246.3	335.2	398.5	476.9
45450	365.8	246.6	336	399.1	477.4
45500	366.5	247	336.7	399.8	478
45550	367.3	247.3	337.4	400.5	478.5
45600	368	247.6	338.1	401.1	479
45650	368.7	247.9	338.8	401.8	479.4
45700	369.3	248.2	339.5	402.5	479.9
45750	370	248.4	340.2	403.2	480.4
45800	370.7	248.8	340.8	403.8	480.8
45850	371.4	249.1	341.5	404.5	481.2
45900	372.1	249.4	342.1	405.2	481.6
45950	372.7	249.8	342.7	405.8	482.1
46000	373.4	250.3	343.4	406.5	482.4
46050	374.1	250.8	344.1	407.2	482.8
46100	374.9	251.3	344.7	407.9	483.1
46150	375.6	251.9	345.4	408.6	483.5
46200	376.4	252.7	346.2	409.3	483.9
46250	377.2	253.4	347	410.1	484.4
46300	378	254.2	347.7	410.8	484.8
46350	378.9	255.1	348.6	411.7	485.3
46400	379.9	256.2	349.6	412.6	486
46450	380.9	257.2	350.6	413.5	486.6
46500	381.9	258.3	351.6	414.5	487.3
46550	383.1	259.6	352.7	415.5	488.2
46600	384.3	261	353.9	416.7	489.2
46650	385.5	262.4	355.1	417.8	490.2
46700	386.7	263.8	356.3	418.9	491.3
46750	388	265.4	357.7	420.3	492.7
46800	389.4	267.1	359.1	421.6	494.2
46850	390.8	268.8	360.4	423	495.7
46900	392.1	270.4	361.8	424.3	497.3
46950	393.5	272.1	363.2	425.8	499
47000	394.9	273.8	364.5	427.2	500.8
47050	396.3	275.5	365.9	428.6	502.6
47100	397.6	276.9	367.1	430	504.5
47150	398.8	278.3	368.3	431.4	506.4
47200	400	279.6	369.4	432.8	508.3
47250	401.3	281	370.6	434.2	510.2
47300	402.3	281.9	371.5	435.4	512
47350	403.3	282.7	372.3	436.6	513.9
47400	404.2	283.5	373.2	437.8	515.8
47450	405.2	284.3	373.9	439	517.6
47500	405.8	284.5	374.4	439.9	519.3
47550	406.5	284.6	374.8	440.9	521
47600	407.2	284.8	375.3	441.9	522.7
47650	407.8	284.8	375.6	442.7	524.3
47700	408.2	284.6	375.8	443.5	525.9
47750	408.7	284.3	376	444.3	527.5
47800	409.2	284	376.2	445.1	529.1
47850	409.6	283.6	376.3	445.9	530.6
47900	410	283.1	376.4	446.6	532.2
47950	410.4	282.6	376.5	447.4	533.8
48000	410.8	282.1	376.5	448.1	535.3
